# Supplementary material
Source: PubMed Central journal article supplement (PMC9004672)
Supplement: NIHMS1794878-supplement-supporting_info.pdf [file NIHMS1794878-supplement-supporting_info.pdf]

## SUPPLEMENTARY INFORMATION

### **From tryptophan to toxin: Nature's convergent biosynthetic strategy to aetokthonotoxin**

Sanjoy Adak<sup>1#</sup>, April L. Lukowski<sup>1#</sup>, Rebecca J. B. Schäfer<sup>1</sup>, Bradley S. Moore<sup>1,2\*</sup>

<sup>1</sup>Center for Marine Biotechnology and Biomedicine, Scripps Institution of Oceanography, University of California at San Diego, La Jolla, California 92093, United States

<sup>2</sup>Skaggs School of Pharmacy and Pharmaceutical Sciences, University of California at San Diego, La Jolla, California, 92093, United States

#These authors contributed equally to this work

\*To whom correspondence should be addressed: [bsmoore@ucsd.edu](mailto:bsmoore@ucsd.edu)

## Table of contents

|                                                                     |    |
|---------------------------------------------------------------------|----|
| 1. Plasmid construction and cloning.....                            | 3  |
| Tables S1–S2.....                                                   | 6  |
| 2. Enzyme expression and purification.....                          | 7  |
| Figures S1–S2.....                                                  | 8  |
| Figure S3.....                                                      | 10 |
| 3. Enzyme assays and LC-MS analysis.....                            | 11 |
| Figures S4–S5.....                                                  | 12 |
| Figures S6–S7.....                                                  | 13 |
| Table S3.....                                                       | 15 |
| Figure S8.....                                                      | 16 |
| Figure S9.....                                                      | 17 |
| Figure S10.....                                                     | 18 |
| Figure S11–S12.....                                                 | 19 |
| Scheme S1.....                                                      | 20 |
| 4. Synthetic procedures of substrates and synthetic standards.....  | 21 |
| 4.1 Synthesis of aetokthonotoxin ( <b>1</b> ).....                  | 21 |
| 4.2 Synthesis of 2,3,5-tribromoindole ( <b>3</b> ).....             | 26 |
| 4.3 Synthesis of 3,5-dibromoindole ( <b>8</b> ).....                | 27 |
| 4.4 Synthesis of 5,7-dibromoindole-3-carbonitrile ( <b>2</b> )..... | 28 |
| 5. NMR spectra.....                                                 | 29 |
| 6. References.....                                                  | 41 |

## 1. Plasmid construction and cloning

**General considerations.** *Escherichia coli* cloning strain DH10B was used for DNA propagation. Individual pET-28a(+) plasmids containing *E. coli* codon-optimized *aetA-F* genes between NdeI and XhoI restriction sites were synthesized and subcloned by Twist Bioscience. All PCR and incubation steps were performed in a BioRad MyCycler Thermal Cycler. PCR-grade water was purchased from Teknova.

### Codon-optimized DNA sequences

#### *aetA*

```
ATGTATGATGTTGTCATCTGCGGCGGCGGACTCGCCGGGCTGTCACTGGCGCGTCAGCTGAAAATGACCAT
GCCGGAGCTCAGCGTTCCTATTCTGGAAAAACATCCGGCGAGGTCCCGGTTTCCCTTATAAGGTGGGAG
AATCCCTGGATGAGACAAGTAACTTCTATCTGTCCAACATTCTGCAGCTGGAAAGCTACTTGCAAGAACAT
CAGTTACATAAACTGGGGCTCCGCTGGTTCCTTTGGTGGCGGCAATCTGCCGCTGGAAACACGTCCGGAGAT
CGGTCCGCCTGAGTTCCTCGAGCATTTCGCGCTCGCCATGTAGACCGCAAAGCTCTTGAGAATCACCTTGTC
AGCTGAACAAAGAATCGGGGGTGGCGCACTTTACGGGTGTTCTGGTCAAGGATATCTTGCTTAGTGAAGAT
GATAGCCCGCATGAAGTTTTATACACTCAGCAGGGCGGCAATCACTTCACGGTGAATGCCGTTGGCTTGT
GGATGCCACAGGCCGCCGCGTTACTTGCAGTCGAAGTTAAACTTGACGCAGCCGAGTGGCCACCGTGCGA
ATGCCGTGTGGTGGCAACTTGAAGGTAAGCACAGCTTAGATAAAATGGCCGACGACGCGGACTGGCTGAGC
CGCAATAACCATCAACGTTGGTTTTCAACTAATCATTTAATGGGTGACGGCTACTGGGTATGGGTCAATCC
GCTCATTACCGCAATACTTCTATCGGCATCGTAGCCGCGGAAGAAATGCATCCCCTGAGCAAACATAGCA
ATTATCAGTCCGCAATGAAATGGCTGGAAGAACATGAACCCCATTTTCGCAAGTTTATCCAGACCAGCACG
GCGCAAAATTTTTTGGCGGTCAAAGACTTCTGTTACCATTCCAGCAAGTATTCAGTGAGAAACGCTGGAG
CTGCGTGGGTGATAGCGCCATCTTACCAGTCCATTTCTATAGCCAGGCGTTGTAATGCTGGCGTACAGCA
ACTGCCGTGACTGTAAAGATGATTGAGCTGGATCATCAGAACCAATTGACCGCGGAAATTTGTTTCAGCAATTT
AACAACTTGCTGCTGCGCGACATTGGACACAATTACCTGCAAATTTACCAGGATAATTTATCCGGTGTGGT
CTCTTTTAACGTTATGAGCATCAAACGTTCTGTTGGGATGCGGTGTATATTTGGTTTTTCCCAGGTGCGCTGT
TTTTTCAGCAGCATTTACCAATCTCGAAGTGTTAAGCAATTTTTCTCGTATTGCACAGCGCTACTTAGCC
TTGAATCAGCGGGTTCAGAACTGTTTCAAGATTGGGGCCAAGCAATTAAGTCAAATTTCCCGTGTGTT
TCTGGCGTACGATATTTCTTACAAACCGACCTGCCTGGGCAAGCCCCGCGCAAACGGCAAACGTTTCTTTT
TCGATATTTTTCAAAGAAGCCCACTTCAGCCTTGTCGAAAAGAAAGACACCCAACAGTATCTGGCGGATCTC
GAAGTGCAAATGCAAGAAGCTGGAAATTTGGGCGCAGGTGATCTTTCGTACAGCTCTGAACCAGGTGATGCC
GGAACGCTGAGTCAAGTCCCTGAACCTTTTTGGGTGAACGTCTGGGCCATCGGCCTGAACCCGGAGAAAT
GGGAAGAGGATCGCCTGTTTCAGCCAGAAACCGAACCGCAGGTTGATCTTTCGTAACACTACATTCTGGCCGAA
TTACCTGATGACCACTATCCTCCTGGCGCGGAACAGTAACGACATCTAGCGTTGATAACCCGGCCTACGT
CGCAGCCGTAAACTAA
```

#### *aetB*

```
ATGACGCTTGAACCTCAAAGCTCGATTCAATCCAAGAGTATCATCACGCCGCTGGCCCGCGGGCTTGCC
GCTGGTTGGTAGCCTTGCACCATTACTGGGTAAGCACTTACACGTGACCCTGAACCAGCTGGCTAAAGAGT
ACGGCAACATTTTCCAGATCCGTATGGGGATTTCGCACGGTCGTGGCACTGAACGGCATCAAACCAATTACC
GAAGCCCTCATTAACAACAGAAAAATTTCAATTAACCGCGCCGATTTTCGAATTTTTTAGCATTCCCGCGGA
CGGCGGGCTGTTTCAAGCCAAGTCGGGTGAGGCTGGGAGAAACATCGCGGTATTGCAGCGAAAGCTATGC
GGACGTTTCGTGATTGATAAGTCCGACCGCGTCGAACATCACATTATGGAGGAAGCAGCGAAACTGGCGGAC
TCTTTCCTTAATTATGATGGCCAGCCATTTGATCCGGACATTCCTTCGAGCCTGGCGGTGGGTTTCGATCAT
CCACCGGGTGTATTTGGCACTCGTGGCTCATCAGAAGATCCAGATTTTGTAGCCACGGCTCGCATTTCTGC
AGTTATTTCCGCTGTCACCCAGCGTATTCTCATTAGCGAGTTCTGCAAAGATCTTACGTCCGGTGTTC
TTTATTTTTTAACCAGAAATCCCTGCAGGACTTTTCAAGATGTTCCAGCAACCGTGGATAAGCTGGTCTCTAA
AAACATTTGAACAGCATCGCAACAGTTTCGACCCAGATAACATTCGTGACATGACGGATGCGTTTTTTGAAAG
CCGCGAATGATCTGTGCGAAAGCGACAAAAAAATTTTAACTTGTCCGAAAATCACATTTCTGCGTGGGACG
CTGATGCAACTGACGGGCGCTGGCTTAGAGCCTGTGCTTATCCAACGATCTGGGCATTTTTATACATGAT
TGCGTATCCCGATATTCAGGCCAAAATTTCAACAAGAAATTAGACGAGGTTGTCCGGCTGGGCCAGCAGCCTT
GTTTTAAACCACCGGGCAAACCTCCATTTACCGAAGCCTGTATCAACGAAATCCTGCGCCACTCAAGCATC
```

AGCCCGATTCCCTTTTCTGTACGCAAGCACTACCGACACTACGATCAACGGGTATAGCGTGCATCAGGGCAC  
TCCCGTGATCATTAACTTTATAGTCTGACCCGCGATGAACGTTATTGGCAGAACCCGACAAATTTGATC  
CGGATCGTTTTCTCGATGAAAATTGCAAATCCGTTCCGATCTGCTGGATAAGTTCTACCCGTTCCGAATT  
GGTCAACGGCGTTGCATGGGCGAATATCTGGCGCGCTGGAAATCTTCATCTTTTTTACGACGCTGATGCA  
TAAATGTAAATTGGAGAAAGTACCGCGTGAAAACTTAGCCTTGAACCAAACCCGGTTCTTTATGCGTC  
CGCAGAAATATAATATCATCGCCAAATCCCGTTCTAA

aetC

ATGTCGAAATCGGAGAACCTCAAAGATGTTGAAATTGAGGTGGAAAAGCTGGAGGGTCGGCATCGCCGCAT  
TTTTGCCAGATTAGATCAGCTACCCCTCTCGAACAGGTATGGCAGGTCATCACGGATTATGAAGCCTTTG  
CGAAATTCATGCCGAACCTCAAAGAAATGTCGGCGTCTGGAACACCCGACCGGAGGCATCCGCTTAGAACAG  
GTTTCGTACCCTGTCTTTTTTGGGTTTAACTTTAGCGGCCGAGTGTGTTTCGACATCGCCGAAGAAATCCC  
GGACAAGATTCAATATCAGCTGGTGGAAAGGTGATTTAAAAGCCTTCAGCGGTGACTGGCGCCTGGCTCCAG  
CGAATCTGGGCGAGAAAGCGGGTGTGGTGTAAACGTATAATTTCTCGATTCTGCCAAACCCCTCTGCTGCCG  
ATTGTCGTGTTGAACGCGTTTTTTTCGCACGACGTTCCGGTCTCTCTGCTTGCTATCCGCCAGCGCGTTGA  
GGATCTTTTTGGTTCAGGTAGTAAGTAA

aetD

ATGAAAGCTATCCTGCAACTGATCCTGAAAAACGCCAAGAATTCGAAAAACTTCCCTGTTTTCGAATTTCGT  
GCGTGACGAAACAATTTCCCCTGAAGAACGCCTGATTCTGTACCCGTGTATCGCTGCGTTTTGCCTTAACT  
TCCGCGATCTGAACCGGTACGATTATCGTGACGATAACTCGTCTGATTATTATCAGAAAATCATTAAACATC  
CATACTCAGGAGGACGCGAAACACTGGGAATGGTTCCTGAATGATCTGGAAGTCTGGGGTTCGATAAAAC  
CATGCGCTTTTTCGGAGGCCCTGCGCTTTGTCTGGTCTGATGATTTACTGCACACTCGTCCGCTCTGCCACA  
ACATTGCCGTGCTGAGTCACGATTTAGAGCCAGTTATGAAGATGGTCTCATCGAGGCGATGGAAACTGCC  
GGGTTAGTCATCTTCCATGCCCTGGCCAAACCGGGGAGTCAATCGCCAAGGCGACGCGCCGCAAAATATCT  
GTACGTCGCAGACAGCCATGTGCAAGTGGAAACGGGGCACGCCGTGGGAACTGAAAACATTATCACCATCC  
TGGAAACAGACTCAGTTGAGCTCTGAGCAGGAGGAAAAAGCTAAAGAGATTGTGAATAAAGTGTTCATGG  
AGCACAACCTTGATTGGCGAGTTGCAACGGTACGTGAAAGCGCATCGTTCTGAAAAAGCGCAACCAACAGC  
GGCCTATTAA

aetE

ATGACACACCATCCGCCGGAGCCGTTTCGCATCAAAAATGGTGGAACTATTAAATTGCTCGACCGCGATGC  
GCGCAAAGCAGCGATTTCGCCGCTCCGGTTACTCTCTCTTTGGGCTGCGCTCGGAAGAAATCTTTATTGATT  
TTTTTACCAGATAGCGGCACCACGGCTATGTCACAACTCAATGGAGCGCGATGTTTCAAGGTGATGAGGCC  
TATGCCGGCGGCTCTTCTTATTTTTCGCCTGGCCGAGGTGATCCATGACATTTTTGGTTTTTGATTATTTTCT  
GCCGACGCACCAGGGCCGCGCTGCGGAAAATATTCTGTCCACATGTATGGTTAAGCCAGATCAGTATGTTT  
CCTCCAATATGCACTTTGATACTACGTACGCGAACATCCGCGCCCGTGGTGGCCGCCGATTAATTTAGTC  
ATTGACGAAGCTCATCATCCCGGTAGTTATCACCTGTTCAAGGGGAACATGAATATCCAGAAATTACGCGC  
TTTTATTGAAGAGGTCCGCCCTAATCAGATTCGGTTCGGTATGATTACTGTCACTAACACGCAGGTGGAG  
GTCAACCCGTAAGCATGGAAAACCTGCGTGCTGTGTCAGCCAGACGTATAAGGAATTCGGTATTCCATTCTTC  
ATTGATGCATGTGTTTTCGCGGAAAACGCGTACCTGATTAAATTACGCGAACCCGGATTACGCTGATAAAAC  
TCCCCTTGAATTTTCGCGCGAAATGTTTCAGTCTGGCAGATGGTATCACTATGTCTGCTAAAAAAGATGGAA  
TGGTCAACATTGGAGGGTTTTATCGCGATGAACGATGAACTGCTGTTTGAACAGGCTCGCAACGAGCTGTTA  
CTGCGCGAAGGTTTTCCCGACCTATGGCGGCTGGCGGGCCGGGATCTTGACGCCATGGCTGTGGGATTCCA  
TGAAGTGTCCAGGAAGACTATCTGGCCTATCGTCTCGTCAAACCGCGTACCTGGGGGATCGGCTGCGTG  
AATTAGAAATCCCAGATCGTTGAACCACCGGGCGGTTCATGCCATTTACATCGATGCGGGGCGTCTGTTGCCA  
CACATCTCACAGAAAGAAATCCCAGCGCATGCGTTAACTGTGCAACTGTACCTGGAGGGCGGCATTTCGTAC  
AGTGGAGATCGGTTCACTGTGCTTCGCCTATCCGGACCCGAAAACCTAACCAATGGTATATCCGAACCTTG  
AGCTGGTTGTTTTAGCACTTCCGCGCCGCGTCTATACCCAGAGCCACCTGGATTACGTGCGCGAAACCCCTG  
GGCAAGACGGTGAATGCTGCGCCAGATTCCGGGCTACCGTATTACCTATGCTCCGAAGGTACTGCGCCA  
ATTCACCGCGCAACTGGAACCAATTAACCTGGACGCCATCCATCTGCGACTCTGTAA

*aetF*

ATGTTGGAGGTATGCATTATCGGCTTTGGGTTCTCTGCGATTCCACTGGTTCGTGAGCTTGCTCGGACGCA  
GACTGAATTCAGATTATTAGCGCAGAGTCGGGGAGTGTGGGACCGCCTGAGCGAGTCCGGTCTGCTGG  
ATTTTAGCCTGGTATCCTCATTTCAGACCTCTTTTTATAGCTTCGACCTCGTCCGTGACTACGAGAAAGAT  
TATTATCCAACCGCAAAACAATTTACGAAATGCATGAACGTTGGCGGTCTGTGTATGAAGAAAAAATCAT  
CCGCGATTTTGTACCAAAAATCGAAAATTTCAAAGACTACAGCCTGATCTCCACCCGCGAGCGGCAAGACAT  
ACGAAGCCAAACATGTTGTGCTGGCGACCGGCTTTGATCGCCTGATGAATACCTTTTTGTCTAACTTTGAT  
AACCATGTTAGCAATAAAACCTTTGTGTTTCGACACCATGGGTGACAGTGCAAACCTTGCTGATTGCGAACT  
TATTCCGAACAACAACAATAATCATCTTGCACCAATGGCTTTACCGCACTGGACCAGGAAGTGCAGGTGC  
TGGGTAAACCATTTACCCTCGATCAGCTGGAAAGCCCAAACCTTCGCTACGTAAGTCTGAGCTTTATGAT  
CGCCTGATGATGTGCGCTGTATACCCCGTACCGTCAACCCCGCCGTCTCATACAATCAGTTCCCACTGAT  
TCGGCGGACTTCAGTTGGGTAGATTCAAAAAGTTCCCGCCCAATGGTCTGATCGCCATTAAGTATTGGC  
CGATCGACCAGTATTATTACCCTTCAATGACGACCTTGAAAATTATATTAGCAAAGGCTACCTGCTTAAAC  
GATATCGCCATGTGGCTTCATACGGGCAAAGTCATCCTGGTCCCGTCAGATACTCCGATTAACCTTTGATAA  
AAAAACCATTACCTACGCGGGCATCGAACGCTCCTTTCATCAATATGTTAAAGGTGACGCTGAGCAGCCTC  
GCCTGCCACCATCTTAATCAATGGCGAGACCCCTTTCGAATACCTTTATCGTGATACTTTCATGGGTGTC  
ATCCCCCAGCGCCTGAACAACATTTATTTCTGGGATACACGCGGCCATTCACCGGTGGTCTGGCAAACAT  
TACCGAAATGCAAAGCCTGTTTCATCCATAAACTGATTACCCAGCCGCAATTCACCAGAAAATCCACCAGA  
ATCTCAGCAAACGTATCACTGCGTACAACCAACATTACTATGGTGCAGCGAAGCCGCGTAAACATGATCAT  
ACGGTTCCCTTCGGCTTCTACACTGAAGATATCGCACGTCTGATTGGCATCCACTATCAGCCGAATGAATG  
TCGTTACGTACGGGATTTGTTGTTCTATTATGCGTTCCCCAACAACGCTTTCAAATATCGTCTGAAGGGGG  
AATACGCCGTGGATGGCGTTGACGAGCTATTAGAAAGTCAACGACAAACACGATCATTACGCGCAAGTT  
TTCGTACAGGCACTGAGCATTTCGTAACATGAACAGTGACGAGGCTGCAGAATGGGACCCTCCGCCGTCG  
TTTTAGTTTTAATGATATGCGCCACAAAGAGGGATACCGTGCCTTTTTGGACACATATCTGAAGGCGTATC  
GTCAGGTGAAAACATTTTCGGTGGATGATACGGTGTGGATGAGGAATGGAATTTTATGGTGAAGGAAGCG  
TGCCAGGTGCGCGATAAAGTAGCTCCCAACATCGAAGAAAAGACTCATTATAGTAAGGATGAAGACGTA  
CAAAGGATTCGTCTGATTCTGTCTATCCTTGACTCAGATATCTCCTCTCTGCCGGATTCTAATGGCTCTC  
GCGGTTCTGGTAATCTTAAAGAGGGTGACCGTCTGTGTAAATTTGAAGCGCAAAGTATTGAGTTCAATTCGT  
CGCCTCCTGCAGCCGAAAAATTATGAACGCTGTTTATCCGTGAATCAACTGTTAGCCCCGGTTCACATCG  
GCATGGGGAAACTGCTTAA

**Construction of pET28-MBP-TEV-*aetB* using Gibson assembly.** The *aetB* gene was amplified from pET-28a(+)-*aetB* using Phusion HF polymerase, 5x HF reaction buffer, and dNTPs (Thermo Scientific) and primers denoted in Table S1 (Integrated DNA Technologies) following the reaction conditions outlined in Table S2. pET28-MBP-TEV (Addgene) was digested with BamHI and XhoI restriction enzymes (New England Biosciences, NEB) at 37 °C for 2 h. Both the *aetB* PCR product and the digested pET28-MBP-TEV plasmid were purified by gel extraction using the QIAquick Gel Extraction Kit (Qiagen) and EconoSpin spin columns for DNA (Epoch Life Science). *aetB* was inserted into the digested pET-MBP-TEV by incubating 3 µL digested plasmid with 1 µL purified amplified *aetB* and 4 µL 2x Gibson Assembly Mix (NEB) at 50 °C for 1 h. The entire reaction mixture was transformed into 50 µL chemically competent *E. coli* DH10B using standard heat shock procedures and spread onto an LB agar plate supplemented with 50 µg/mL kanamycin (Thermo Scientific). Successful insertion of *aetB* was verified by sequencing (GENEWIZ).

**Table S1.** PCR primers used in this study.

| Primer name                | Primer DNA sequence (Gibson overhangs are in lowercase)          |
|----------------------------|------------------------------------------------------------------|
| AetB_pET28a-MBP-TEV_GA_fwd | 5' – gaaaatctatactccaagatccATGACGCTTGAACCTCAAAGCTCGATTC – 3'     |
| AetB_pET28a-MBP-TEV_GA_rev | 5' – ggtggtggtggtggtgctcagTTAGAACC GGATTTGGCGATGATATTATATTC – 3' |

**Table S2.** PCR reaction conditions for the amplification of *aetB* with Gibson overhangs.

| <b>Component</b>        | <b>[stock]</b>  | <b>[reaction]</b> | <b>Volume added (50 <math>\mu</math>L total)</b> |
|-------------------------|-----------------|-------------------|--------------------------------------------------|
| pET-28a(+)- <i>aetB</i> | 100 ng/ $\mu$ L | 2 ng/ $\mu$ L     | 1 $\mu$ L                                        |
| Forward Primer          | 10 $\mu$ M      | 0.2 $\mu$ M       | 1 $\mu$ L                                        |
| Reverse Primer          | 10 $\mu$ M      | 0.2 $\mu$ M       | 1 $\mu$ L                                        |
| dNTPs                   | 10 mM           | 0.2 mM            | 1 $\mu$ L                                        |
| Buffer HF               | 5x              | 1x                | 10 $\mu$ L                                       |
| Phusion polymerase      | 2 U/ $\mu$ L    | 1 U               | 0.5 $\mu$ L                                      |
| PCR water               | -               | -                 | 35.5 $\mu$ L                                     |

PCR program

|       |        |           |
|-------|--------|-----------|
| 98 °C | 30 s   | 1 cycle   |
| 98 °C | 10 s   |           |
| 66 °C | 30 s   | 35 cycles |
| 72 °C | 45 s   |           |
| 72 °C | 10 min | 1 cycle   |
| 4 °C  | hold   |           |

## 2. Protein expression and purification

**General considerations.** All growth media and purification buffers were prepared with water filtered with a Milli-Q water purification system equipped with a Q-POD dispenser. Fast protein liquid chromatography (FPLC) was conducted on a Cytiva ÄKTA Pure 25 L1 system fitted with an F9-C fraction collector and S9 sample pump and controlled by Unicorn v7 software. Buffers were vacuum filtered with 0.2 µm nylon filters (MilliporeSigma). 5 mL HisTrap FF columns (Cytiva) were used for affinity chromatography. Large cultures (>500 mL) were centrifuged with a Beckman Coulter Avanti JXN-26 centrifuge. Cell lysis was performed by sonication with a QSonica Q500 ultrasonic processor. Protein samples were analyzed with Tris SDS-PAGE gels (BioRad supplies) and Quick Coomassie Stain (Anatrace). All purification steps were performed at 4 °C unless otherwise indicated.

**Expression protocol for AetA, AetC, AetF, and SsuE.**<sup>1</sup> pET-28a(+) plasmids containing *aetA*, *aetC*, *aetF*, or *ssuE* genes were transformed into chemically competent *E. coli* BL21(DE3) cells using standard heat shock procedures and plated onto LB agar supplemented with 50 µg/mL kanamycin. Single colonies were used to inoculate 10 mL LB media containing 50 µg/mL kanamycin and these starter cultures were incubated at 37 °C, 200 rpm overnight. The overnight cultures were used to inoculate 1 L TB media supplemented with 0.4% glycerol and 50 µg/mL kanamycin. Cultures were incubated at 37 °C, 180 rpm until the optical density at 600 nm (OD<sub>600</sub>) reached 0.8-1. The cultures were chilled on ice for approx. 20 min as the incubator cooled to 18 °C, at which point the expression of each protein was induced by the addition of 0.1 mM isopropyl-β-D-1-thiogalactopyranoside (IPTG, 100 µL of 1 M stock). The induced 1 L cultures were incubated at 18 °C, 180 rpm overnight (~18 h) prior to harvesting by centrifugation (5000 x *g*, 20 min). Average wet mass of cells varied from 13.6 g (AetC) to 23.9 g (AetF).

**Purification protocol for AetA, AetC, AetF, and SsuE.** Pellet from 1 L TB culture was resuspended in ~80 mL cold lysis buffer (50 mM Tris-HCl pH 7.4, 300 mM NaCl, 10% glycerol, 10 mM imidazole) and sonicated in a glass beaker on ice, 5 min total “on” time, 3 s on, 7 s off. Lysed cells were centrifuged at 17000 rpm for 30 min at 4 °C. Supernatant was filtered through 0.45 µm syringe filters (CellTreat) prior to loading onto the FPLC for purification on a 5 mL HisTrap FF column. Buffer A was the lysis buffer as previously indicated, and Buffer B was 50 mM Tris-HCl pH 7.4, 300 mM NaCl, 10% glycerol, 250 mM imidazole. The column was equilibrated with 5 column volumes (CV) of 0% Buffer B at 5 mL/min, and the sample was loaded at 2 mL/min via the sample pump followed by a 10 mL wash with Buffer A through the sample pump. The loaded column was washed with 8% Buffer B for 10 CV at 2.5 mL/min and protein was eluted in a linear gradient from 8-100% Buffer B over 15 CV at 2 mL/min. Fractions containing AetA or AetF were analyzed on a 10% Tris SDS-PAGE gel, and AetC was analyzed with a 12.5% gel. Fractions containing the desired protein were concentrated to 2.5 mL using Amicon centrifugal molecular weight cutoff filters (50 kDa for AetA and AetF, 10 kDa for AetC). Concentrated proteins were desalted using PD-10 desalting columns (Cytiva) equilibrated with storage buffer (50 mM Tris-HCl pH 8, 100 mM NaCl, 10% glycerol) following package directions. Yields were determined by standard Bradford assay (~ 5 mg AetA, ~ 2 mg AetC, and ~ 47 mg AetF) and purity assessed by Tris SDS-PAGE (see Figure S1). AetF was bright yellow in color, while AetA and AetC were colorless. SsuE was purified in a similar manner as described above, yielding ~1.5 mg of colorless protein.

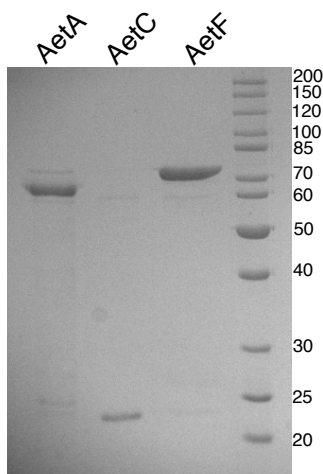

**Figure S1.** 10% Tris SDS-PAGE gel with samples of purified His-tagged AetA, AetC, and AetF. The purity shown represents the purity of the samples used in enzymatic assays. Sizes estimated by ProtParam are as follows for each His-tagged protein: AetA – 71059.64 Da; AetC – 22151.36 Da; and AetF – 80055.34 Da.

**Flavin quantification in AetF.** The absorbance spectrum of 1 mL of 10  $\mu$ M AetF was measured from 300 nm to 700 nm in 2 nm increments in a polystyrene cuvette (BrandTech) using a Cary 60 UV-vis spectrophotometer (Agilent Technologies). The sample was transferred to a microcentrifuge tube, and 20  $\mu$ L of 10% sodium dodecyl sulfate (SDS) was added. The sample was mixed, incubated at room temperature for 10 min, and the UV absorbance spectrum was measured again from 300 nm to 700 nm in 2 nm increments. The percentage flavin incorporated was determined using the extinction coefficient of free FAD at 450 nm (Figure S2, red trace,  $\epsilon_{450} = 11300 \text{ M}^{-1} \text{ cm}^{-1}$ ). The percent FAD incorporation was determined to be approximately 86%, and the extinction coefficient of AetF with FAD bound was found to be approximately  $11870 \text{ M}^{-1} \text{ cm}^{-1}$ .

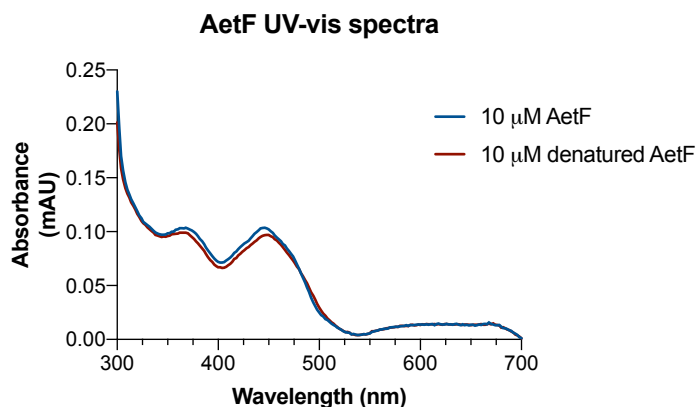

**Figure S2.** UV-vis absorbance spectra of 10  $\mu$ M purified AetF (blue) and 10  $\mu$ M purified and denatured AetF (red).



### **Expression and purification protocol for AetD**

The AetD gene containing overexpression plasmid (pET28a) was transformed into *E. coli* BL21 (DE3). A single colony was used to inoculate 10 mL of LB medium containing 40 µg/mL of kanamycin, and the starter culture was grown overnight at 37 °C with shaking (220 rpm). 1.0 liter of TB medium containing 40 µg/mL of kanamycin was inoculated with this starter culture. The cells were grown at 37 °C with shaking (220 rpm) until the culture reached an OD600 of 0.6. The culture was then incubated at 4 °C for ~30 min without shaking. The culture was induced by adding IPTG to a final concentration of 0.5 mM, the temperature was lowered to 18 °C, and the cells were grown with shaking (200 rpm) for a further 20 hours. The cells were then harvested by centrifugation at 10,000 x g for 10 min at 4 °C and stored at -80 °C.

The cell pellet was re-suspended in 30 mL of lysis buffer (50 mM KH<sub>2</sub>PO<sub>4</sub>, 150 mM NaCl, 10 mM imidazole, pH 8.0). Lysozyme (15 mg) was added, and the cells were lysed by sonication on ice (six cycles of 30 sec durations during which 1.0 sec sonicator pulses at output level 0.6 were followed by 1.0 sec pauses). The resulting suspension was centrifuged (40,000 x g, 30 min), and the clarified supernatant was loaded onto a 5 mL Ni-NTA-affinity column pre-equilibrated with lysis buffer kept at 4 °C. The Ni-NTA-affinity column was then washed with 50 mL wash buffer (50 mM KH<sub>2</sub>PO<sub>4</sub>, 150 mM NaCl, 20 mM imidazole, pH 8.0). The protein was eluted from the column with elution buffer (50 mM KH<sub>2</sub>PO<sub>4</sub>, 150 mM NaCl, 200 mM imidazole, pH 8.0). The fractions containing protein were collected and concentrated using YM-10 Amicon ultracentrifugal filters at 5000 x g to a final volume of 2.5 mL. The concentrated sample was buffer exchanged, using PD-10 desalting column (Cytiva), into 50 mM Tris-HCl pH 8, 100 mM NaCl, 10% glycerol. Yields were determined by standard Bradford assay (a typical yield was 70 mg/liter), and purity assessed by Tris SDS-PAGE (see Figure S3).

### **Expression and purification protocol for AetE**

pET28a overexpression plasmid containing the AetE encoding gene and pGro7 plasmid containing GroEL-GroES encoding genes were transformed into *E. coli* BL21 (DE3). A starter culture was grown overnight in 10 mL of LB medium containing 40 µg/mL of kanamycin and 30 µg/mL of chloramphenicol at 37 °C. 1.0 liter of TB medium containing 40 µg/ml of kanamycin, 30 µg/mL of chloramphenicol and 2 mg/mL L-arabinose was inoculated with this starter culture. The cells were grown at 37 °C with shaking (220 rpm) until the culture reached an OD600 of 0.6. The culture was then incubated at 4 °C for ~30 min without shaking. Then the culture was induced by adding IPTG to a final concentration of 0.5 mM. The rest of the overexpression and purification protocol were the same as discussed for AetD. A typical yield was 35 mg/mL.

### **Expression and purification protocol for AetB**

For the overexpression of MBP-AetB fusion protein, pET28-MBP-TEV-*aetB* plasmid was transformed into *E. coli* BL21 (DE3). A starter culture was grown overnight in 10 mL of LB medium containing 40 µg/mL of kanamycin at 37 °C. 1.0 liter of TB medium containing 40 µg/mL of kanamycin was inoculated with this starter culture. The cells were grown at 37 °C with shaking (220 rpm) until the culture reached an OD600 of 0.6. The culture was then incubated at 4 °C for ~30 min without shaking. Then the culture was induced by adding 0.5 mM IPTG and 1 mM 5-aminolevulinic acid. The rest of the overexpression and purification protocol were the same as discussed for AetD. A typical yield was 20 mg/mL.

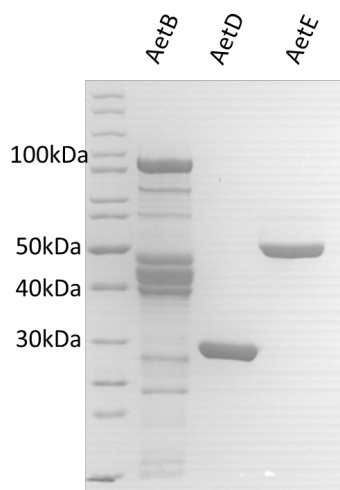

**Figure S3.** 10% Tris SDS-PAGE gel with samples of purified AetB, AetD, and AetE. The purity shown represents the purity of the samples used in enzymatic assays. Sizes estimated by ProtParam are as follows: His-MBP-AetB – 99290 Da; His-AetD – 29998 Da; and His-AetE – 54602 Da. The two intense lower bands in the AetB sample likely correspond to His-MBP (44718 Da) and cleaved AetB (55096 Da).

### 3. Enzyme assays and LC-MS analysis

**General considerations.** HPLC separations were performed using an Agilent Technologies 1200 series HPLC equipped with a degasser, binary pump, autosampler, and diode array detector. Analytical-scale separations were performed with an Agilent Eclipse XDB-C18 5  $\mu\text{m}$ , 4.6 x 150 mm column fitted with a guard cartridge, and semi-preparative separations were performed with a Kinetex 5  $\mu\text{m}$  C18 100  $\text{\AA}$ , 250 x 10.0 mm column. Solvents used were HPLC-grade. Data were collected and analyzed using ChemStation for LC 3D systems version B.02.01. LC-MS analysis was performed with an Agilent Technologies 1260 Infinity series HPLC equipped with a degasser, binary pump, autosampler, and diode array detector coupled to an Agilent Technologies 6530 Accurate-Mass Q-TOF LC/MS. Separations were performed with a Kinetex 5  $\mu\text{m}$  C18 100  $\text{\AA}$ , 150 x 4.6 mm column. Solvents used were mass spectrometry-grade. Data was collected and analyzed using MassHunter Workstation Software version B.05.01. For both HPLC and LC-MS systems, solvent A was water + 0.1% formic acid and solvent B was acetonitrile + 0.1% formic acid.

HPLC Method 1 (semi-preparative scale AetF reaction): 2 mL  $\text{min}^{-1}$  flow rate; 0-5 min 5% B, 5-15 min 5-95% B, 15-18 min 95-100% B, 18-20 min 100-5% B, 20-25 min 5% B.

HPLC Method 2 (analytical-scale AetE reactions): 0.75 mL  $\text{min}^{-1}$  flow rate; 0-5 min 5% B, 5-15 min 5-95% B, 15-18 min 95-100% B, 18-20 min 100-5% B, 20-25 min 5% B.

LC-MS Method 1 (analytical-scale AetA reactions and flavin analysis): 0.75 mL  $\text{min}^{-1}$  flow rate; 0-5 min 5% B, 5-15 min 5-95% B, 15-18 min 95-100% B, 18-20 min 100-5% B, 20-25 min 5% B. Dual ESI ion source, negative polarity.

LC-MS Method 2 (analytical-scale AetB and AetD reactions): 0.75 mL  $\text{min}^{-1}$  flow rate; 0-4 min 10% B, 4-11 min 10-95% B, 11-21 min 95% B, 21-23 min 95%-10% B, 23-27 min 10% B. Dual ESI ion source, negative polarity.

**Analytical-scale AetF reactions.** 50  $\mu\text{L}$  reactions consisting of 5  $\mu\text{M}$  AetF, 100  $\mu\text{M}$  FAD, 500  $\mu\text{M}$  L-tryptophan (**4**) or 5-bromo-L-tryptophan (**5**), 1 mM NADPH, 10 mM KBr, and 50 mM Tris-HCl pH 8 buffer were prepared in 1.5 mL centrifuge tubes and incubated at 30  $^{\circ}\text{C}$  overnight. Reactions were quenched by the addition of 100  $\mu\text{L}$  methanol and centrifuged at 14,000 rpm for 10 min prior to filtering with 0.2  $\mu\text{m}$  centrifugal filters. 25  $\mu\text{L}$  of the filtered sample was injected on a Kinetex 5  $\mu\text{m}$  C18 (150 x 4.6 mm) column using LC-MS Method 1.

**Preparative-scale AetF reaction and purification.** A 24.5 mL AetF reaction was prepared with 1  $\mu\text{M}$  AetF, 1 U/mL glucose-6-phosphate dehydrogenase, 5 mM glucose-6-phosphate, 1 mM  $\text{NADP}^+$ , 1 mM L-tryptophan (**4**) (5 mg total), 10 mM KBr, 100  $\mu\text{M}$  FAD, and 50 mM Tris-HCl pH 8 buffer in a 250 mL Erlenmeyer flask, adding AetF last. The reaction was incubated at 30  $^{\circ}\text{C}$ , 120 rpm overnight (19 h total) and quenched by the addition of ~50 mL methanol. The reaction was centrifuged at 10,000  $\times g$  for 10 min to pellet precipitated protein. The supernatant was transferred to a round bottom flask, and methanol was removed by rotary evaporation. The remaining water mixture was lyophilized overnight and extracted 3 times with 1 mL methanol. The extraction was filtered through an 0.2  $\mu\text{m}$  syringe filter and concentrated to ~500  $\mu\text{L}$  by rotary evaporation. The 5,7-dibromo-L-tryptophan (**6**) product was purified by HPLC using a Kinetex 5  $\mu\text{m}$  C18 (250 x 10.0 mm) column and HPLC Method 1. Acetonitrile was removed by rotary evaporation and the remaining water solution was lyophilized overnight to yield 3.6 mg (40.6% yield) of **6** as a fluffy white powder.  $^1\text{H-NMR}$  (500 MHz,  $\text{d}_6$ -DMSO)  $\delta$  [ppm] = 11.43 (s, 1H), 8.37 (s, 1H), 7.81 (d,  $J$  = 1.7 Hz, 1H), 7.43 (d,  $J$  = 1.7 Hz, 1H), 7.33 (s, 1H), 3.44 (dd,  $J$  = 7.7, 4.5 Hz, 1H), 3.19 (dd,  $J$  = 15.1, 4.5 Hz, 1H), 3.02 (dd,  $J$  = 15.1, 7.7 Hz, 1H).  $^{13}\text{C-NMR}$  (126 MHz,  $\text{d}_6$ -DMSO)  $\delta$  [ppm] = 166.2, 133.6, 130.5, 127.2, 124.9, 120.8, 111.2, 110.7, 104.9, 54.7, 27.0.<sup>2</sup>

**Analytical-scale AetA reactions.** 50  $\mu\text{L}$  reactions containing 30  $\mu\text{M}$  AetA, 1 U/mL glucose-6-phosphate dehydrogenase, 10 mM glucose-6-phosphate, 1 mM  $\text{NADP}^+$ , 1  $\mu\text{M}$  SsuE, 500  $\mu\text{M}$  5-bromoindole (**7**), 50 mM Tris-HCl pH 8 buffer, 10 mM KBr, and DMSO to a final concentration of 10% were prepared in 1.5 mL centrifuge tubes and incubated at room temperature (approx. 22  $^{\circ}\text{C}$ ) overnight. Reactions were quenched by the addition of 100  $\mu\text{L}$  methanol and centrifuged at 14,000 rpm for 10 min prior to filtering with 0.2  $\mu\text{m}$  centrifugal filters. 10  $\mu\text{L}$  of the filtered sample was injected on a Kinetex 5  $\mu\text{m}$  C18 (150 x 4.6 mm) column using LC-MS Method 1. Reactions with 3,5-dibromoindole (**8**), L-tryptophan (**4**), 5-bromo-L-tryptophan (**5**), and desbromo-AETX (**S1**) were conducted under the same conditions. Reactions omitting SsuE were performed with SsuE storage buffer in place of the protein (50 mM Tris-HCl pH 8, 100 mM NaCl, 10% glycerol).

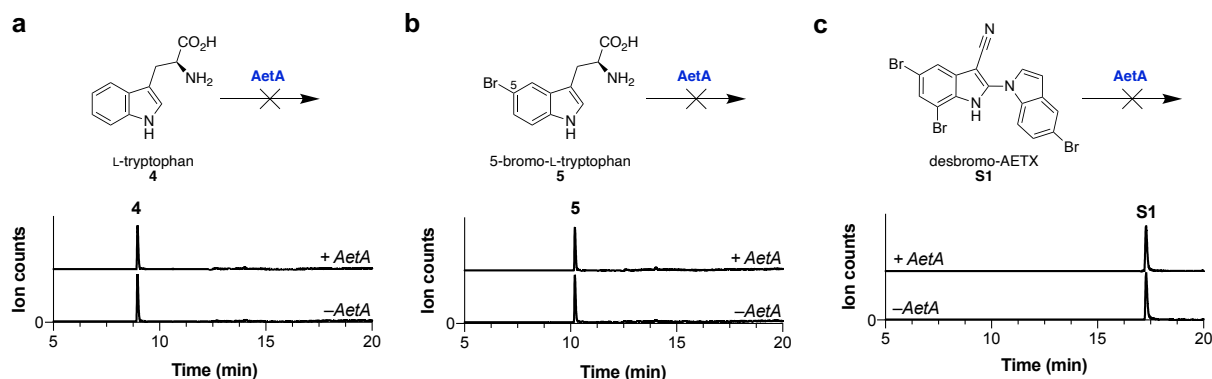

**Figure S4.** AetA reactions with a) L-tryptophan (**4**), b) 5-bromo-L-tryptophan (**5**), and c) desbromo-AETX (**S1**). LC-MS traces are EICs of the substrates and hypothetical brominated product masses. No brominated products were observed in any of these reactions and no substrate consumption is evident, suggesting AetA is not active on these substrates.

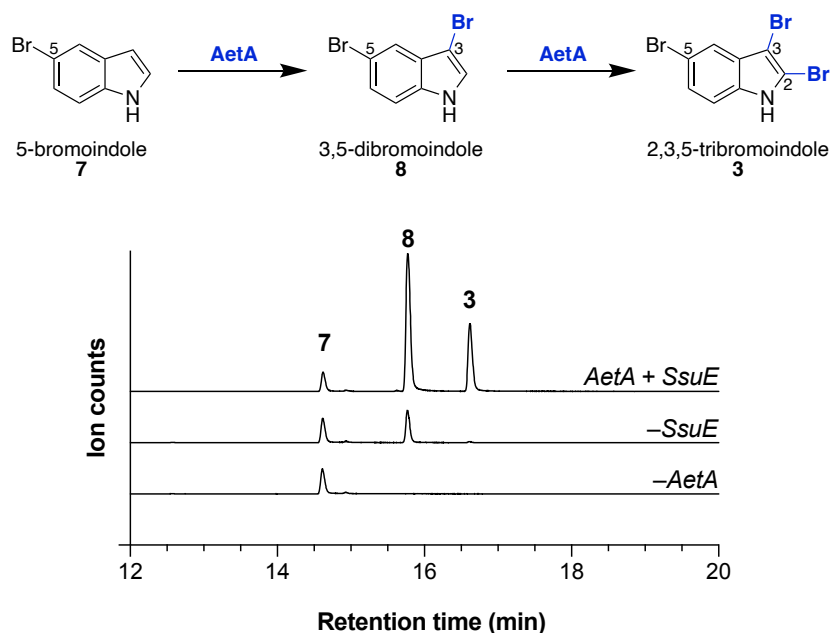

**Figure S5.** Comparison of AetA reaction with and without SsuE added to reduce FAD in reaction with 5-bromoindole (**7**).

**Flavin cofactor identification in AetF.** 50  $\mu\text{L}$  of 50  $\mu\text{M}$  purified AetF was precipitated with 50  $\mu\text{L}$  methanol, vortexed vigorously, and centrifuged at 14,000 rpm for 10 min to pellet precipitated protein. The supernatant was filtered through an 0.2  $\mu\text{m}$  centrifugal filter, and 2  $\mu\text{L}$  of the sample was injected on a Kinetex 5  $\mu\text{m}$  C18 (150 x 4.6 mm) column using LC-MS Method 1 and compared to an equimolar concentration of pure FAD standard.

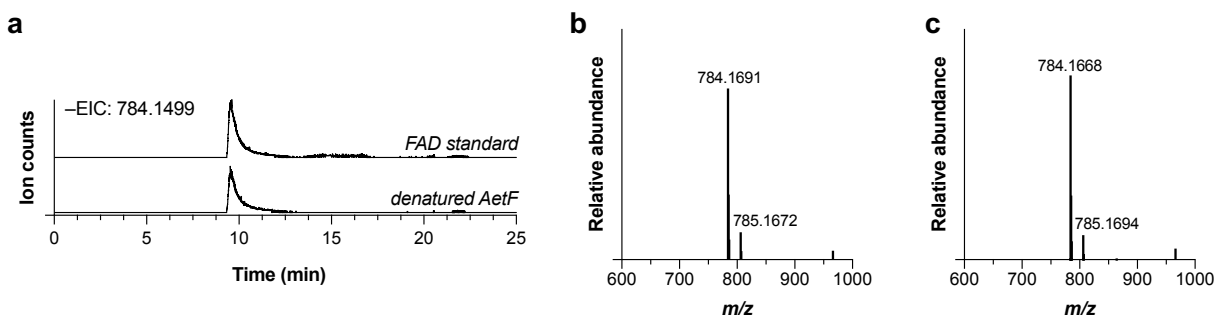

**Figure S6.** LC-MS comparison of denatured AetF to an FAD standard. a) HPLC separation showing the EIC of FAD in negative ionization mode ( $m/z$  784.1499). b) MS extraction of denatured AetF. c) MS extraction of FAD standard.

**AetF NAD(P)H preference.** 1 mL reactions containing 1  $\mu\text{M}$  AetF, 100  $\mu\text{M}$  NADH or NADPH, 250  $\mu\text{M}$  L-tryptophan (**4**), 10 mM KBr, and 50 mM Tris-HCl pH 8 buffer were prepared, adding AetF last. In no substrate controls, equal volume of DMSO relative to the volume of substrate added was used. The consumption of NAD(P)H was monitored at 340 nm for 5 min using polystyrene cuvettes (BrandTech) and a Cary 60 UV-vis spectrophotometer (Agilent Technologies). The extinction coefficients of NADH and NADPH were used to calculate the concentration of NAD(P)H being consumed. The rapid consumption of NADPH compared to NADH in Figure S7 suggests that NADPH is the preferred reducing cofactor of AetF.

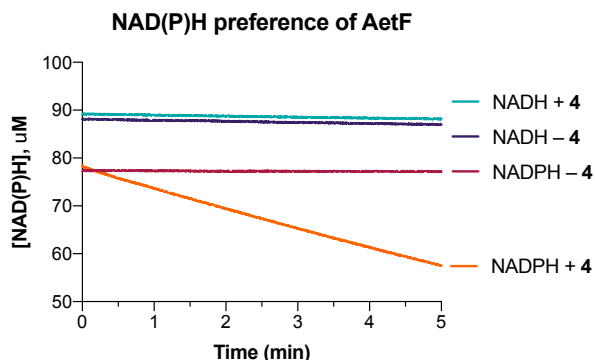

**Figure S7.** Consumption of NAD(P)H by AetF over time in the presence and absence of L-tryptophan (**4**).

**Sequence similarity network generation.** The amino acid sequences of representative flavin-dependent monooxygenases (FMOs) from each categorical group are listed in Table S3.<sup>3</sup> These sequences were used to generate a limited sequence similarity network (SSN) using the EFI-EST server at an E-value of 5 and an alignment score of 15. The network was visualized and annotated in Cytoscape v3.6.1.<sup>4</sup> An expanded sequence similarity network consisting of a broader array of flavin-dependent halogenase sequences was constructed using the published dataset and analysis parameters provided in Fisher et al.<sup>5</sup>

**Table S3.** Enzymes included in the representative FMO sequence similarity network presented in this work. UniProt ID numbers are shown for each sequence, with the exception of SatH and PCMO sequences that are indicated by UniParc IDs.

| Enzyme abbreviation | Type                          | Uniprot       | Enzyme abbreviation | Type    | Uniprot       |
|---------------------|-------------------------------|---------------|---------------------|---------|---------------|
| AetF                | halogenase (single component) | A0A861B9Z9    | RIFMO               | Group A | F2R776        |
| AetA                | halogenase (two component)    | A0A861B8S3    | VioD                | Group A | Q9S3U8        |
| Bmp5                | halogenase (single component) | A0A166V3F8    | VioC                | Group A | Q9S3U9        |
| hs_Bmp5             | halogenase (single component) | A0A1S6M1M2    | RebC                | Group A | Q8K125        |
| VemK                | halogenase (single component) | A0A410P811    | PgaE                | Group A | Q93LY7        |
| PrnA                | halogenase (two component)    | G0ZGJ1        | RdmE                | Group A | Q54530        |
| HalB                | halogenase (two component)    | Q71ME2        | SibG                | Group A | COLTM1        |
| RebH                | halogenase (two component)    | Q8KHZ8        | AuaG                | Group A | H1ZZA4        |
| PyrH                | halogenase (two component)    | K7QVV7        | FmqB                | Group A | Q4WLW7        |
| CmdE                | halogenase (two component)    | Q0VZ69        | AspB                | Group A | PODOW1        |
| ThdH                | halogenase (two component)    | A1E280        | AsuE1               | Group A | D7P5V0        |
| KtzQ                | halogenase (two component)    | A8CF75        | XiaO                | Group A | I3VFC5        |
| KtzR                | halogenase (two component)    | A8CF74        | CHMO                | Group B | P12015        |
| SttH                | halogenase (two component)    | E9P162        | FMO3                | Group B | P31513        |
| MibH                | halogenase (two component)    | E2IHC5        | PvdA                | Group B | Q51548        |
| SpmH                | halogenase (two component)    | A0A1W7D4T7    | YUC2                | Group B | Q9SVQ1        |
| MalA                | halogenase (two component)    | L0E155        | PAMO                | Group B | Q47PU3        |
| BrvH                | halogenase (two component)    | B4WBL8        | CpnB                | Group B | Q8GAW0        |
| Tar14               | halogenase (two component)    | W5VG40        | CzcO                | Group B | O50641        |
| VirX1               | halogenase (two component)    | M4SKV1        | MbtG                | Group B | Q1B6B3        |
| BorH                | halogenase (two component)    | M9QSI0        | HapE                | Group B | Q93TJ5        |
| SatH                | halogenase (two component)    | UPI000996F5C4 | Sno1                | Group B | Q8MP06        |
| PltA                | halogenase (two component)    | B3G2A5        | TMO                 | Group B | Q83XK4        |
| CmlS                | halogenase (two component)    | Q9AL91        | OTEMO               | Group B | H3JQW0        |
| Pyr29               | halogenase (two component)    | A3R4S0        | FMO1                | Group B | P38866        |
| CndH                | halogenase (two component)    | B9ZLJ5        | SCO7468             | Group B | Q8CJJ9        |
| Bmp2                | halogenase (two component)    | U6BGC3        | CddA                | Group B | Q938F6        |
| Clz5                | halogenase (two component)    | U6A3L4        | CpdB                | Group B | T2HVF7        |
| Mpy16               | halogenase (two component)    | J7H1A1        | AcmA                | Group B | A1IHE6        |
| CtoA                | halogenase (two component)    | A0A0M4KXQ6    | EthA                | Group B | P9WNF8        |
| PHBH                | Group A                       | P00438        | MtmOIV              | Group B | Q194P4        |
| MICAL               | Group A                       | Q8VDP3        | PenE                | Group B | E3VVK3        |
| HPCCDO              | Group A                       | A0A7W6SQT2    | StcW                | Group B | Q00730        |
| PdxH                | Group A                       | P0AFI7        | IucD                | Group B | B0R9Q2        |
| NahG                | Group A                       | P23262        | PubA                | Group B | Q8ECU3        |
| PheA                | Group A                       | P31020        | SsDesB              | Group B | B5HNG5        |
| KMO                 | Group A                       | P38169        | LuxA                | Group C | P19907        |
| DhpH                | Group A                       | Q93NG3        | CamE36              | Group C | D7UER1        |
| HPAO                | Group A                       | A0A4Y1MVS5    | SsuD                | Group C | P80645        |
| TfdB                | Group A                       | Q8KN28        | LadA                | Group C | O50325        |
| MobA                | Group A                       | Q6SSJ6        | HPAH                | Group C | Q6Q272        |
| XinD                | Group A                       | Q9F131        | DmoA                | Group C | E9JFX9        |
| ABMO                | Group A                       | Q92402        | CamP                | Group C | Q6STM1        |
| NphA                | Group A                       | A0A285B4J2    | NtaA                | Group C | P54989        |
| OnpA                | Group A                       | A7KS54        | DszC                | Group C | Q64F43        |
| TetX                | Group A                       | B1MM05        | BdsA                | Group C | Q8GRC7        |
| NamA                | Group A                       | A0A109YL79    | EmoA                | Group C | Q9F9T3        |
| HpbA                | Group A                       | O06647        | RutA                | Group C | P75898        |
| PcpB                | Group A                       | P42535        | KijD3               | Group D | B3TMR1        |
| BdxA                | Group A                       | A0A375IET4    | PCMO                | Group D | UPI00197ED330 |
| PhacB               | Group A                       | Q078T0        | NpcB                | Group D | Q6F4M9        |
| HpxO                | Group A                       | A6T923        | TftD                | Group D | O87009        |
| NicC                | Group A                       | P86491        | Reut_A1585          | Group D | Q47112        |
| MhpA                | Group A                       | P77397        | VlmH                | Group D | P96072        |
| NicB                | Group A                       | B1N1A2        | NcnH                | Group D | D8IPV8        |
| DntB                | Group A                       | Q2PWU9        | StyA                | Group E | O50214        |
| OpdA                | Group A                       | A7YJX0        | ZEP                 | Group E | Q9FGC7        |
| NPMO                | Group A                       | A0A1E1F818    | LimB                | Group E | Q9EUT9        |
| UbiH                | Group A                       | P25534        | SQLE                | Group E | Q14534        |
| UbiF                | Group A                       | P75728        | SpeA                | Group G | B7H6U9        |
| Ubil                | Group A                       | P25535        | DavB                | Group G | B3IVI6        |
| TmuM                | Group A                       | I7ASS7        | PAO                 | Group G | Q5W9R9        |
| SdgC                | Group A                       | Q7X281        | laaM                | Group G | P06617        |
| PhzS                | Group A                       | Q9HWG9        | LMO                 | Group H | P21795        |
|                     |                               |               | NMO                 | Group H | Q12723        |

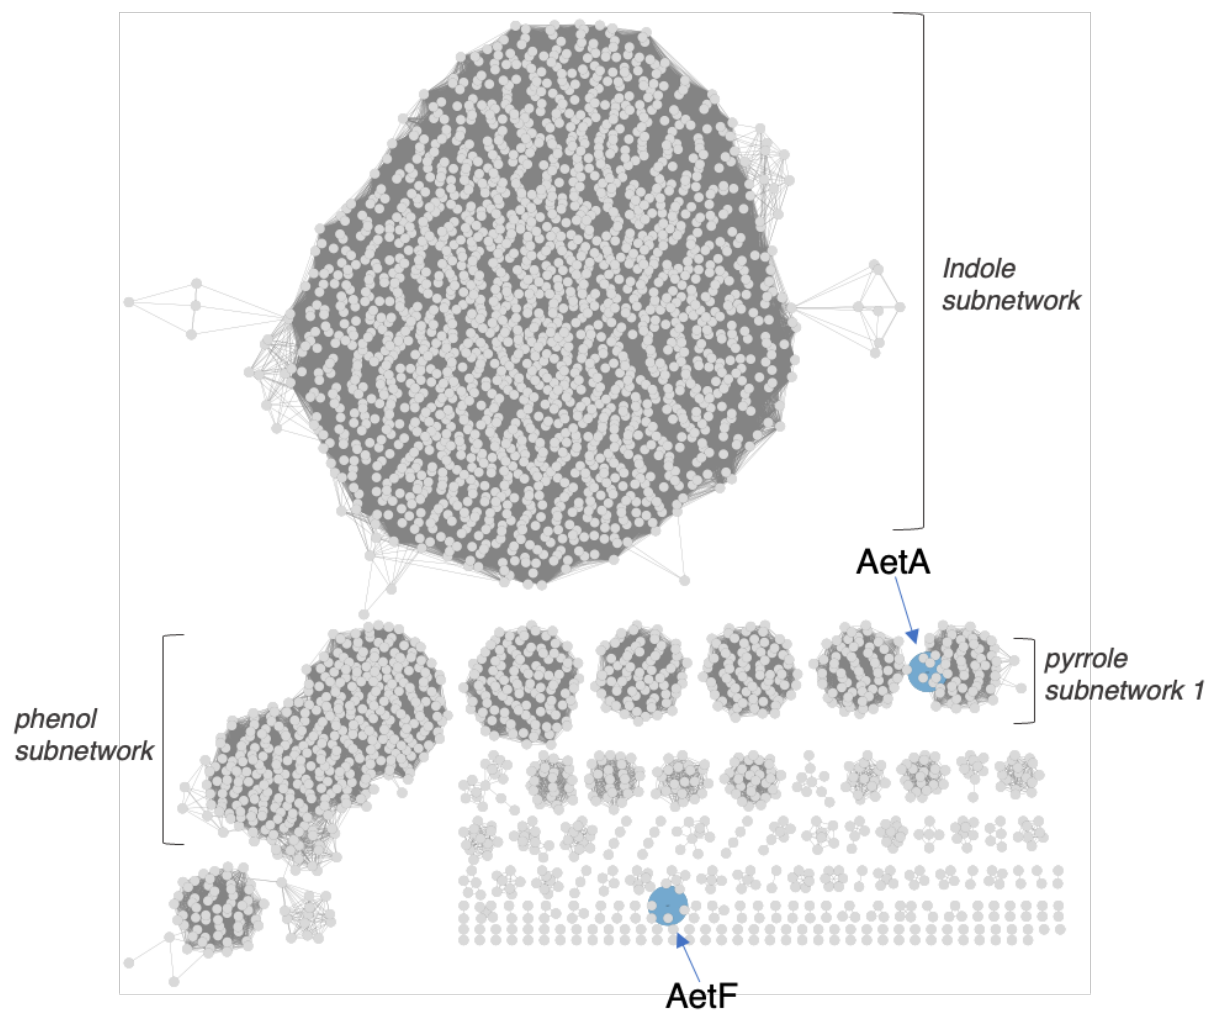

**Figure S8.** Expanded sequence similarity network of flavin-dependent halogenases. The curated flavin-dependent halogenase sequence dataset and selected subnetwork labels are derived from Fisher et al.<sup>5</sup> Protein sequences for AetA and AetF were seeded into the dataset and analyzed following the published data analysis parameters. AetA clusters with a subset of pyrrole halogenases while AetF is a singleton.



**Analytical-scale AetB reaction.** A typical 100  $\mu\text{L}$  reaction mixture contained 500  $\mu\text{M}$  2,3,5-tribromoindole (**3**), 500  $\mu\text{M}$  5,7-dibromoindole-3-carbonitrile (**2**), 3  $\mu\text{M}$  spinach ferredoxin (Fdx), 1  $\mu\text{M}$  spinach ferredoxin reductase (FdR), 75  $\mu\text{g}$  AetB in 100 mM phosphate buffer, pH 7.5. The reaction was initiated by adding 2 mM NADPH and incubated at RT overnight. The reaction was quenched by the addition of 100  $\mu\text{L}$  acetonitrile, and the resulting solution was filtered using 0.2  $\mu\text{m}$  centrifugal filters. The samples were analyzed by LC-MS Method 2.

**Analytical-scale AetB reaction using different indoles.** The reaction was set up using the similar condition discussed above. The only difference being 500  $\mu\text{M}$  5-bromoindole (**7**) and 500  $\mu\text{M}$  5,7-dibromoindole (**S2**) were also added in the reaction mixture. The EICs of the corresponding coupled products were looked for during LC-MS analysis.

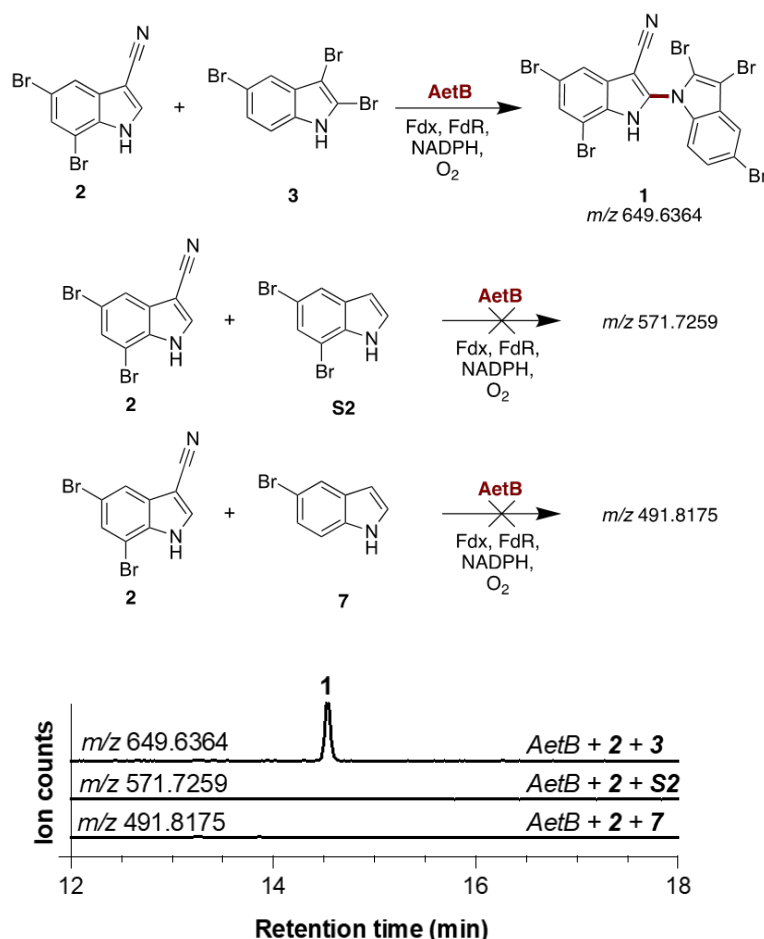

**Figure S9.** AetB reactions with **2** and 5-bromoindole (**7**) and 5,7-dibromoindole (**S2**). The AetB reaction with **2** and **3** is shown as a positive control.

**Analytical-scale AetE reaction:** The AetE catalyzed reaction was performed in 100 mM phosphate buffer, pH 7.5. A 100  $\mu\text{L}$  aliquot of the reaction mixture containing 500  $\mu\text{M}$  5-bromo-L-tryptophan (**5**) and 50  $\mu\text{M}$  AetE was incubated at RT overnight. The reaction was quenched by the addition of 100  $\mu\text{L}$  acetonitrile, and the resulting solution was filtered using 0.2  $\mu\text{m}$  centrifugal filters. The samples were analyzed by HPLC Method 2.

**Detection of pyruvate in AetE reaction:** The AetE catalyzed reaction was performed as discussed above. After the overnight incubation 1 mM *o*-(2,3,4,5,6-pentafluorobenzyl)-hydroxylamine (PFBHA) was added to the reaction mixture and incubated for 30 min at 50 °C. Upon denaturing the protein using 50% acetonitrile, the sample was filtered using 0.2 μM centrifugal filters. The samples were analyzed by LC-MS Method 2.

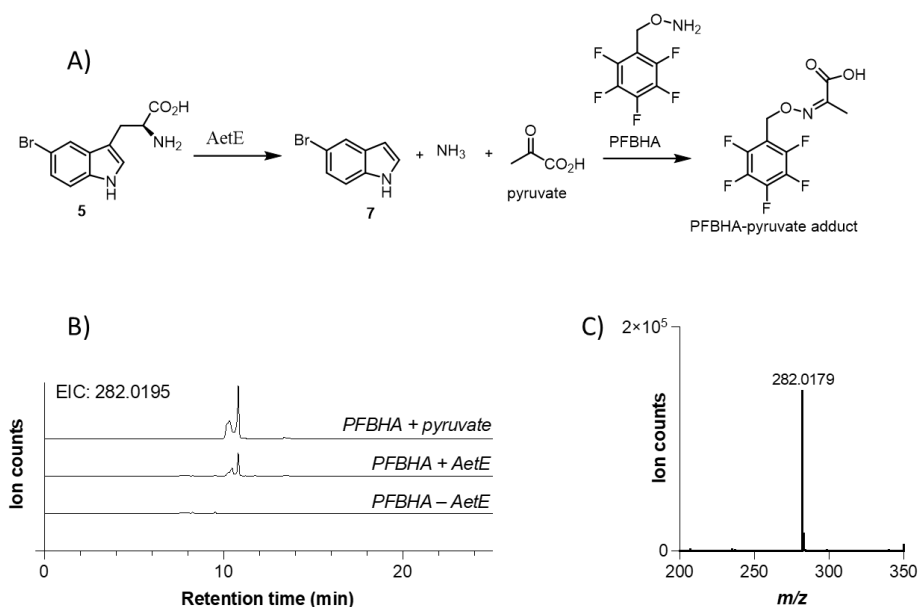

**Figure S10.** A) PFBHA was used to trap pyruvate generated in AetE reaction. B) Chromatograms shown are EICs of PFBHA-pyruvate adduct ( $m/z$  282.0195) analyzed in negative ionization mode. C) Exact mass of the PFBHA-pyruvate adduct in negative ionization mode.

**Analytical-scale AetC and AetD reaction:** The reaction was carried out in 100 mM phosphate buffer, pH 7.5. A 100  $\mu$ L reaction mixture containing 500  $\mu$ M 5,7-dibromotryptophan (**6**), 2  $\mu$ M AetC, and 25  $\mu$ M AetD was incubated at RT overnight. The reaction was quenched by the addition of 100  $\mu$ L acetonitrile, and the resulting solution was filtered using 0.2  $\mu$ M centrifugal filters. The samples were analyzed by LC-MS Method 2.

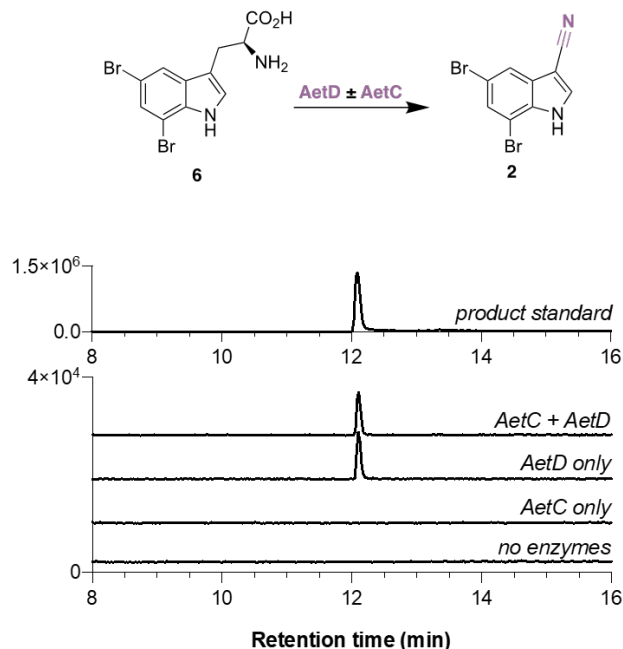

**Figure S11.** AetD reactions with **6** in the presence and absence of AetC. Chromatograms shown are EICs of **2** ( $m/z$  298.8648) analyzed in negative ionization mode.

**Screening of first row transition metals for improved AetD activity:** Here is the list of metal salts screened for improved AetD activity:  $\text{MnCl}_2$ ,  $(\text{NH}_4)_2\text{Fe}(\text{SO}_4)_2$ ,  $\text{FeCl}_3$ ,  $\text{CoCl}_2$ ,  $\text{NiCl}_2$ ,  $\text{CuCl}_2$ ,  $\text{ZnSO}_4$ . The reaction was carried out in 100 mM phosphate buffer, pH 7.5. A 100  $\mu$ L reaction mixture containing 500  $\mu$ M 5,7-dibromotryptophan (**6**), 50  $\mu$ M AetD, and 1 mM of the individual metal ion was incubated at RT overnight. The reaction was quenched by the addition of 100  $\mu$ L acetonitrile, and the resulting solution was filtered using 0.2  $\mu$ M centrifugal filters. The samples were analyzed by LC-MS Method 2.

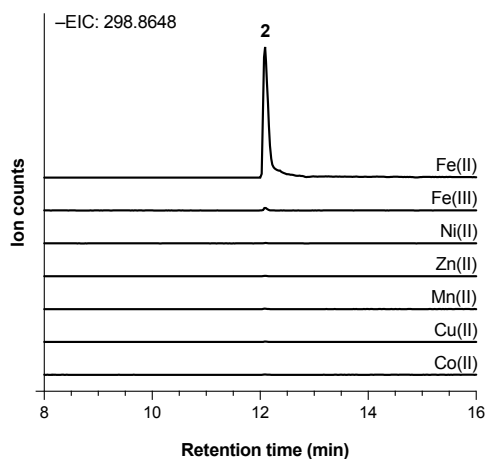

**Figure S12.** AetD reactions with **6** in the presence of different transition metals. Chromatograms shown are EICs of **2** ( $m/z$  298.8648) analyzed in negative ionization mode.

**AetD reaction in the presence of  $^{15}\text{NH}_4\text{Cl}$ :** A 100  $\mu\text{L}$  reaction mixture containing 500  $\mu\text{M}$  5,7-dibromotryptophan (**6**), 50  $\mu\text{M}$  AetD, 1mM  $(\text{NH}_4)_2\text{Fe}(\text{SO}_4)_2$ , 10mM  $^{15}\text{NH}_4\text{Cl}$  in 100 mM phosphate buffer, pH 7.5 was incubated at RT overnight. The reaction was quenched by the addition of 100  $\mu\text{L}$  acetonitrile, and the resulting solution was filtered using 0.2  $\mu\text{M}$  centrifugal filters. The samples were analyzed by LC-MS method 2.

**AetD reaction in the presence of enzymatically prepared 5,7-dibromotryptophan-(amino- $^{15}\text{N}$ ):** To prepare 5,7-dibromotryptophan-(amino- $^{15}\text{N}$ ) ( $^{15}\text{N}$ -**6**), a reaction mixture containing 500  $\mu\text{M}$  L-tryptophan-(amino- $^{15}\text{N}$ ) ( $^{15}\text{N}$ -**4**), 5  $\mu\text{M}$  AetF, 10 mM KBr, 2 mM NADPH in 100 mM phosphate buffer, pH 7.5 was incubated in RT for 5 hrs. Afterwards, 50  $\mu\text{M}$  AetD and 1 mM  $(\text{NH}_4)_2\text{Fe}(\text{SO}_4)_2$  were added to the reaction mixture and incubated overnight. The reaction was quenched by the addition of 100  $\mu\text{L}$  acetonitrile, and the resulting solution was filtered using 0.2  $\mu\text{M}$  centrifugal filters. The samples were analyzed by LC-MS method 2.

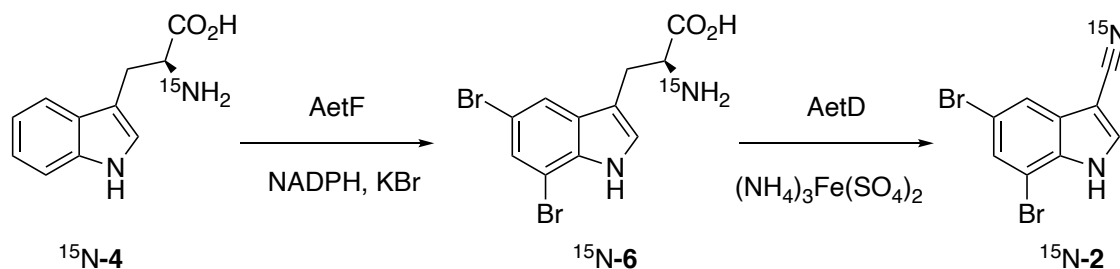

**Scheme S1.** Schematic showing AetD catalyzed reaction in the presence of enzymatically generated 5,7-dibromotryptophan-(amino- $^{15}\text{N}$ ) ( $^{15}\text{N}$ -**6**).

#### 4. Synthetic procedure of substrates and synthetic standards

**General considerations.** All chemicals were purchased from Fisher Scientific, Alfa Aesar, or MilliporeSigma without further purification. All solvents were of HPLC grade or higher. Preparative flash column chromatography was carried out on a Teledyne ISCO CombiFlash® Rf+ Lumen™ system using silica gel 60 (EMD, 40–63 μm) for the stationary phase. NMR spectroscopic data were obtained on a 500 MHz JEOL NMR spectrometer with either a 3.0 mm probe or a 5.0 mm probe. The values of the chemical shifts are described in ppm and coupling constants are reported in Hz. NMR chemical shifts were referenced to the residual solvent peaks ( $\delta$ H 2.50 and  $\delta$ C 39.5 for DMSO- $d_6$ ;  $\delta$ H 7.26 and  $\delta$ C 77.16 for CDCl<sub>3</sub>;  $\delta$ H 3.58  $\delta$ C 67.57 for THF- $d_8$ ). NMR data analysis was performed using MestreNova® 14.21-27684, 2021.

#### 4.1 Synthesis of aetokthonotoxin (1)

##### 5,7-Dibromoindoline (**S3**)

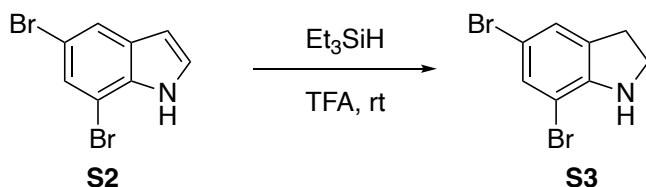

Adapted from Tomakinian *et al.*<sup>7</sup>

5,7-Dibromoindole **S2** (100 mg, 0.724 mmol, 1.0 equiv.) was weighed into a 10 mL flask. TFA (2.0 mL) was added dropwise, and the reaction mixture was stirred until 5,7-dibromoindole **S2** was completely dissolved. Then Et<sub>3</sub>SiH (116 μL, 1.452 mmol, 2.0 equiv.) was added dropwise, and the reaction mixture was heated to 60 °C overnight. After removal of TFA through evaporation, sat. NaHCO<sub>3</sub> (aq) was added under ice cooling. The aqueous phase was extracted twice with CH<sub>2</sub>Cl<sub>2</sub>, and the combined organic layers were washed with brine, dried over MgSO<sub>4</sub>, filtered, and concentrated under reduced pressure. The crude product was purified by normal phase column chromatography with a gradient of 0–100% EtOAc in hexanes. 5,7-dibromoindoline **S3** was obtained as a yellow oil in 85% yield (178 mg, 0.615 mmol). TLC (Hex:EtOAc (2:1) R<sub>F</sub> = 0.8).

<sup>1</sup>H-NMR (500 MHz, CDCl<sub>3</sub>)  $\delta$  [ppm] = 7.28 (dd, J = 1.7 Hz, 1H), 7.11 (d, J = 1.5 Hz, 1H), 3.97 (bs, 1H\*, 3.62 (t, J = 8.5, 2H), 3.23–3.03 (m, 2H). <sup>13</sup>C-NMR (126 MHz, CDCl<sub>3</sub>)  $\delta$  [ppm] = 149.50, 132.21, 131.64, 126.51, 109.53, 102.98, 46.90, 30.76.

The following synthetic route was adapted from Ricardo et al.<sup>6</sup>

### 5,7-Dibromo-1-methoxy-1H-indole (**S5**)

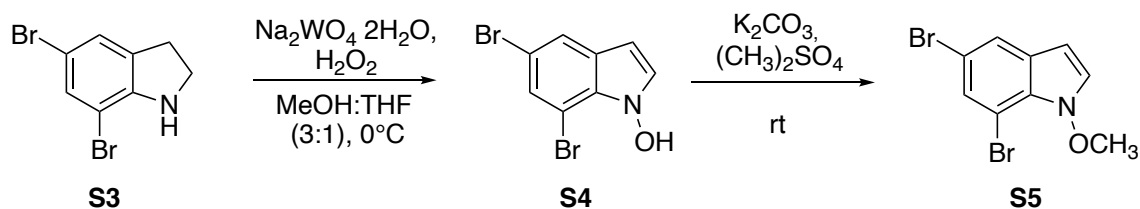

5,7-dibromindoline **S3** (178 mg, 0.642 mmol, 1.0 equiv.) was dissolved in 4 mL  $\text{MeOH}:\text{THF}$  (3:1) at  $0^\circ\text{C}$ .  $\text{Na}_2\text{WO}_5$  (38 mg, 0.129 mmol, 0.2 equiv.) was dissolved in 500  $\mu\text{L}$   $\text{H}_2\text{O}$  and added to the stirred solution of **S3** followed by dropwise addition of 30%  $\text{H}_2\text{O}_2$  (656  $\mu\text{L}$ , 10 equiv.). The resulting solution was stirred at  $0^\circ\text{C}$ . After 1 h additional  $\text{Na}_2\text{WO}_5$  (29 mg, 0.098 mmol, 0.15 equiv.) dissolved in 400  $\mu\text{L}$   $\text{H}_2\text{O}$  and 30%  $\text{H}_2\text{O}_2$  (600  $\mu\text{L}$ , 9 equiv.) was added, and the reaction was stirred until complete consumption of starting material was observed by TLC ( $R_f$  (toluene) = 0.29). Dimethyl sulfate (340  $\mu\text{L}$ , 1.8 mmol, 5.6 equiv.) was added to the crude reaction mixture at room temperature, followed by  $\text{K}_2\text{CO}_3$  (390 mg, 2.88 mmol, 4.5 equiv.). The reaction mixture was vigorously stirred for 1 h until full consumption of starting material **S4** was observed by TLC (Hex:EtOAc (9:1)  $R_F$  = 0.55). Brine and  $\text{CHCl}_3$  were added in equal ratios, phases were separated, and the aqueous phase was extracted twice with  $\text{CHCl}_3$ . The combined organic phases were dried over  $\text{MgSO}_4$ , filtered, and concentrated under reduced pressure. The crude product was purified by automated column chromatography (gradient: 5 min 100% hexanes, 5-15 min 0-10% EtOAc). 5,7-dibromo-1-methoxy-1H-indole (**S5**) was obtained as a white solid in 26% yield (50 mg, 0.166 mmol).

$^1\text{H-NMR}$  (500 MHz,  $\text{CDCl}_3$ )  $\delta$  [ppm] = 7.64 (d,  $J$  = 1.7 Hz, 1H), 7.51 (d,  $J$  = 1.7 Hz, 1H), 7.29 (d,  $J$  = 3.4 Hz, 1H), 6.31 (d,  $J$  = 3.5 Hz, 1H), 4.09 (s, 3H).  $^{13}\text{C-NMR}$  (126 MHz,  $\text{CDCl}_3$ )  $\delta$  [ppm] = 129.08, 128.31, 128.15, 126.34, 122.90, 113.06, 102.60, 98.25, 67.84.

### 5,7-Dibromo-1-methoxy-1H-indole-3-carbonitrile (**S7**)

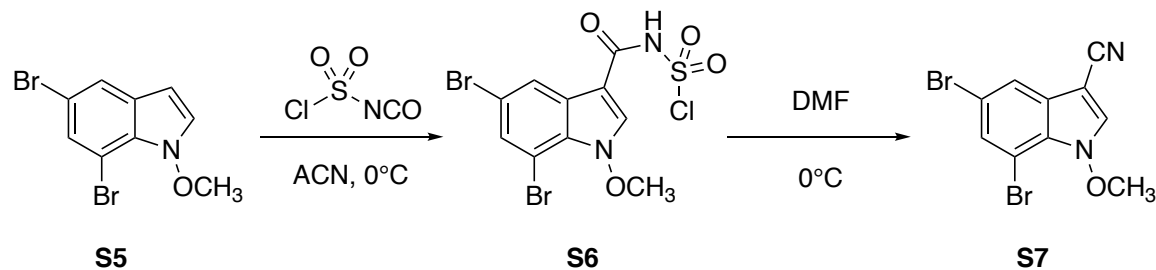

**S5** (50 mg, 0.164 mmol, 1.0 equiv.) was dissolved in  $\text{CH}_3\text{CN}$  (1 mL), cooled to  $0^\circ\text{C}$ , and  $\text{CSI}$  (50  $\mu\text{L}$ , 0.575 mmol, 3.4 equiv.) was added. The reaction mixture turned slightly pink and after 30 min a white precipitate formed. To convert intermediate **S6** to **S7**,  $\text{DMF}$  (0.5 mL) was added at  $0^\circ\text{C}$  and the precipitate redissolved, rendering a slightly yellow solution. TLC analysis showed full consumption of starting material and formation of a single new product (Hex:EtOAc (4:1)  $R_F$  = 0.3). The reaction mixture was concentrated under reduced pressure and resuspended in equal volumes of  $\text{H}_2\text{O}$  and EtOAc. Phases were separated, and the organic phase was washed three times with  $\text{LiCl}_{\text{aq}}$  (5%) and once with brine. The organic layer was dried over  $\text{MgSO}_4$ , filtered, and

concentrated under reduced pressure. 5,7-dibromo-1-methoxy-1*H*-indole-3-carbonitrile (**S7**) was obtained in 58% yield (32 mg, 54  $\mu\text{mol}$ ) as a white powder.

**$^1\text{H-NMR}$**  (500 MHz,  $\text{CDCl}_3$ )  $\delta$  [ppm] = 7.84 (d,  $J = 1.6$  Hz, 1H), 7.80 (s, 1H), 7.67 (d,  $J = 1.7$  Hz, 1H), 4.18 (s, 3H).  **$^{13}\text{C-NMR}$**  (126 MHz,  $\text{CDCl}_3$ )  $\delta$  [ppm] = 132.05, 131.77, 127.72, 127.51, 121.85, 116.28, 113.72, 103.57, 82.90, 69.16.

#### Desbromo-aetokthonotoxin (**S1**)

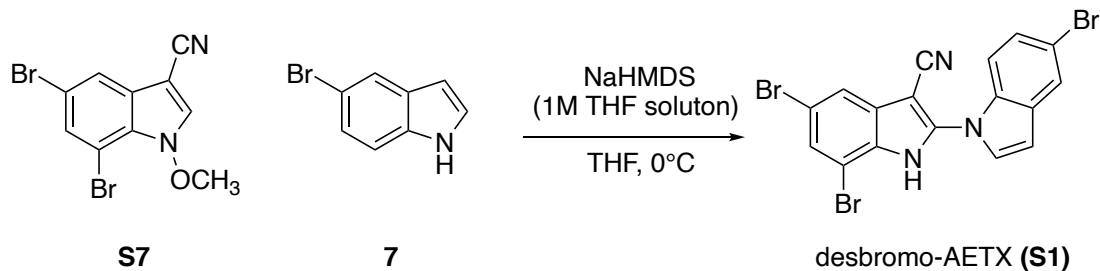

5-bromoindole (**7**) (13 mg, 65  $\mu\text{mol}$ , 1.2 equiv.) was dissolved in anhydrous THF (400  $\mu\text{L}$ ), cooled to 0  $^\circ\text{C}$ , and flushed with argon. NaHMDS (1 M THF solution) (110  $\mu\text{L}$ , 109  $\mu\text{mol}$ , 2.0 equiv.) was added dropwise under inert gas atmosphere. The reaction mixture was stirred for 30 min at 0  $^\circ\text{C}$ . 5,7-dibromo-1-methoxy-1*H*-indole-3-carbonitrile (**S7**) (18 mg, 55  $\mu\text{mol}$ , 1.0 equiv.) was dissolved in anhydrous THF (400  $\mu\text{L}$ ), purged with argon, and then added dropwise to the reaction mixture at 0  $^\circ\text{C}$ , which immediately turned dark red. The reaction was allowed to slowly warm up to room temperature. The reaction was quenched with sat  $\text{NH}_4\text{Cl}_{\text{aq}}$ , followed by addition of equal volume EtOAc. The phases were separated, and the organic phase was washed with brine, dried over  $\text{MgSO}_4$ , filtered, and concentrated under reduced pressure. The crude product was purified by reversed phase HPLC (80-100%  $\text{CH}_3\text{CN}$ , 20 min), and the desired product desbromo-AETX (**S1**) was obtained as a white solid in 78% yield (21 mg, 42  $\mu\text{mol}$ ). TLC: Hex:DCM (2:1)  $R_F = 0.7$

**$^1\text{H-NMR}$**  (500 MHz,  $d_8$ -THF)  $\delta$  [ppm] = 10.87 (s, 1H, NH), 7.92 (d,  $J = 1.8$  Hz, 1H), 7.86 (d,  $J = 2.0$  Hz, 1H), 7.73 (d,  $J = 1.7$  Hz, 1H), 7.70 (d,  $J = 3.4$  Hz, 1H), 7.54 (d, 8.7 Hz, 1H), 7.42 (dd,  $J = 8.8$ , 2.0 Hz, 1H), 6.81 (d,  $J = 3.4$  Hz, 1H).  **$^{13}\text{C-NMR}$**  (126 MHz,  $d_8$ -THF)  $\delta$  [ppm] = 142.61, 136.09, 132.57, 132.34, 130.55, 130.22, 127.20, 124.78, 121.93, 116.46, 116.06, 113.97, 113.57, 107.09, 106.73, 82.21.

### Protected desbromo-aetokthonotoxin (**S8**)

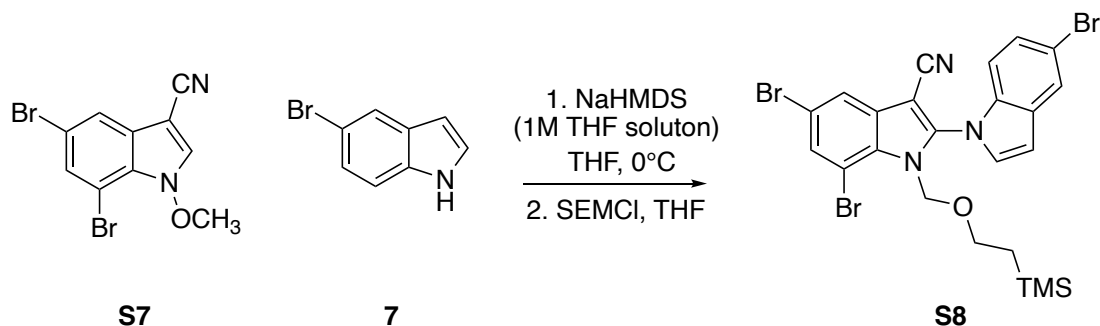

5-bromoindole **7** (22 mg, 112  $\mu\text{mol}$ , 1.2 equiv.) was dissolved in anhydrous THF (0.8 mL), cooled to 0 °C, and flushed with argon. NaHMDS (1 M THF solution) (224  $\mu\text{L}$ , 224  $\mu\text{mol}$ , 2.0 equiv.) was added dropwise, and the reaction was stirred for 15 min at 0 °C. Dibrominated nitrile indole **S7** (31 mg, 94  $\mu\text{mol}$ , 1.0 equiv.) was dissolved in anhydrous THF (0.8 mL) and added dropwise at 0 °C to the reaction mixture. The reaction mixture was allowed to slowly warm up to room temperature. After 2 h, SEMCl (40  $\mu\text{L}$ , 225  $\mu\text{mol}$ , 2.4 equiv.) was added and stirred for 5 min. The reaction mixture was quenched through addition of  $\text{NH}_4\text{Cl}$  and diluted with EtOAc. Phases were separated, and the aqueous phase was extracted three times with equal volumes EtOAc. The combined organic layers were washed with brine, dried over  $\text{MgSO}_4$ , filtered, and concentrated under reduced pressure. The crude product was purified by normal phase column chromatography (0-20% EtOAc in hexanes). The desired product **S8** was obtained in 57% yield (33 mg, 53  $\mu\text{mol}$ ) as a white powder. TLC (Hex:EtOAc)  $R_F = 0.8$ .

$^1\text{H-NMR}$  (500 MHz,  $\text{CDCl}_3$ )  $\delta$  [ppm] = 7.89 (d,  $J = 1.8$  Hz, 1H), 7.87 (d,  $J = 1.9$  Hz, 1H), 7.78 (d,  $J = 1.8$  Hz, 1H), 7.42 (dd,  $J = 8.7, 1.9$  Hz, 1H), 7.35 (d,  $J = 3.4$  Hz, 1H), 7.15 (d,  $J = 8.7$  Hz, 1H), 6.86-6.78 (m, 1H), 5.74 (d,  $J = 10.6$  Hz, 1H), 5.24 (d,  $J = 10.6$  Hz, 1H), 3.33-3.03 (m, 2H), 0.75-0.70 (m, 2H), -0.12 (s, 9H).  $^{13}\text{C-NMR}$  (126 MHz,  $\text{CDCl}_3$ )  $\delta$  [ppm] = 142.3, 135.8, 133.1, 130.8, 130.3, 130.2, 129.4, 127.2, 124.5, 121.83, 117.1, 115.8, 112.5, 112.1, 106.8, 106.4, 84.7, 72.9, 66.6, 17.8, -1.5.

### Aetokthonotoxin (**1**)

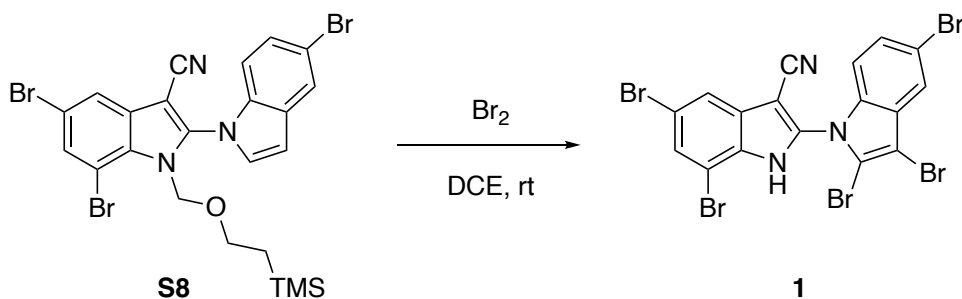

Protected biindole **S8** (20 mg, 32  $\mu\text{mol}$ , 1.0 equiv) was dissolved in dichloroethane (0.5 mL). To the solution was then added 400  $\mu\text{L}$  of a freshly prepared bromine stock solution (50  $\mu\text{L}$  bromine in 2.5 mL dichloroethane; 160.2  $\mu\text{mol}$ , 5.0 equiv.) at room temperature. The reaction mixture was stirred at room temperature for 1 h until TLC showed full consumption of starting material (Hex:EtOAc (9:1),  $R_F = 0.5$ ). The mixture was quenched with sat.  $\text{Na}_2\text{S}_2\text{O}_4$  until decolorization of the reaction mixture was observed. Equal volumes of EtOAc were added, and phases were



separated. The organic phase was washed three times with saturated NaHCO<sub>3</sub> solution and once with brine. The combined organic fraction was dried over MgSO<sub>4</sub>, filtered, and concentrated in vacuo. The crude product was dissolved in small amounts of CH<sub>2</sub>Cl<sub>2</sub>. After 5 min a white precipitate formed. The supernatant was removed, and the white solid was taken up in toluene and concentrated under reduced pressure to dryness. The final natural product AETX (**1**) was obtained as a crystalline white solid in 72% yield (15 mg, 23 μmol). The <sup>1</sup>H and <sup>13</sup>C NMR signals agree with the reported literature value.<sup>6</sup>

**<sup>1</sup>H-NMR** (500 MHz, *d*<sub>8</sub>-THF) δ [ppm] = 12.50 (s, 1H), 8.04 (d, J = 1.7 Hz, 1H), 7.83 (d, J = 1.6 Hz, 1H), 7.77 (d, J = 1.8 Hz, 1H), 7.47 (dd, J = 8.8, 1.9 Hz, 1H), 7.26 (d, J = 8.8 Hz, 1H). **<sup>13</sup>C-NMR** (126 MHz, *d*<sub>8</sub>-THF) δ [ppm] = 138.13, 137.79, 132.91, 131.26, 130.15, 129.68, 129.01, 122.72, 122.66, 117.37, 117.30, 116.81, 113.72, 112.60, 107.56, 98.22, 88.23.

## 4.2 Synthesis of 2,3,5-tribromoindole (3)

This synthesis was carried out following the protocol reported in Ricardo et al.<sup>6</sup>

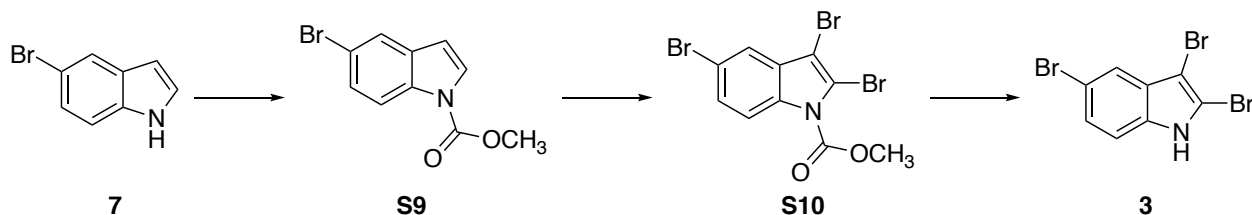

### Methyl 5-bromo-1H-indole-1-carboxylate (**S9**)

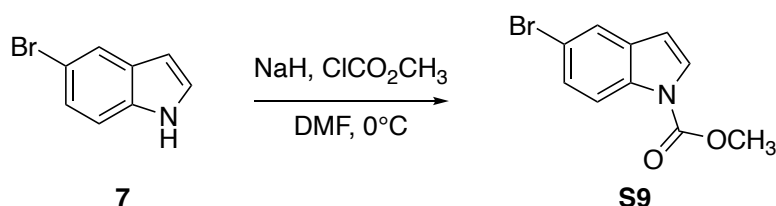

5 mL DMF was added to a mixture containing 5-bromoindole (**7**) (1 g, 5.1 mmol) and 60% NaH in mineral oil (0.24 g, 6.1 mmol) at  $0^\circ\text{C}$ . After 30 min of stirring, methyl chloroformate (0.47 mL, 6.1 mmol) was added, and the reaction was stirred until total consumption of the starting material. The reaction was quenched with saturated  $\text{NH}_4\text{Cl}$ , diluted with EtOAc, washed with brine, and dried over  $\text{MgSO}_4$ . Following the removal of the solvent by evaporation at reduced pressure and purification by flash column chromatography on  $\text{SiO}_2$  (EtOAc/hexane), **S9** was obtained in 50% yield.

$^1\text{H-NMR}$  (500 MHz,  $\text{CDCl}_3$ )  $\delta$  [ppm] = 8.05 (d,  $J = 8.9$  Hz, 1H), 7.70 (d,  $J = 2.0$  Hz, 1H), 7.60 (d,  $J = 3.7$  Hz, 1H), 7.42 (dd,  $J = 8.7, 2.0$  Hz, 1H), 6.54 (d,  $J = 3.7$  Hz, 1H), 4.04 (s, 3H).  $^{13}\text{C-NMR}$  (126 MHz,  $\text{CDCl}_3$ )  $\delta$  [ppm] = 151.35, 134.08, 132.29, 127.48, 126.77, 123.79, 116.65, 116.49, 107.48, 54.14.<sup>8</sup>

### Methyl 2,3,5-tribromo-1H-indole-1-carboxylate (**S10**)

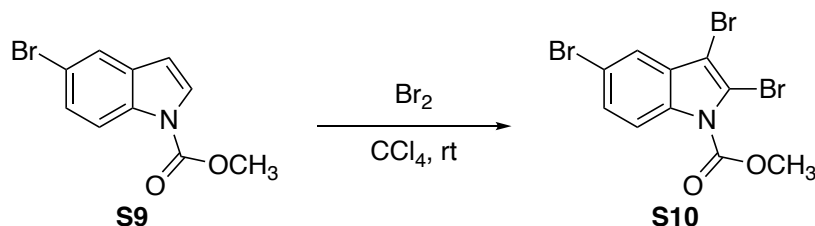

Bromine (0.10 mL, 1.9 mmol) dissolved in  $\text{CCl}_4$  (1 mL) was added dropwise to a solution containing compound **S9** (60 mg, 0.24 mmol) in  $\text{CCl}_4$  (10 mL). The reaction was stirred at room temperature for 12 h. The reaction was quenched with saturated  $\text{Na}_2\text{S}_2\text{O}_3$ , washed with saturated  $\text{NaHCO}_3$ , brine, and dried over  $\text{MgSO}_4$ . After evaporation of the solvent at reduced pressure, the crude product was purified by flash column chromatography on  $\text{SiO}_2$  (EtOAc/hexane) to yield compound **S10** in 40% yield.

**<sup>1</sup>H-NMR** (500 MHz, CDCl<sub>3</sub>) δ [ppm] = 7.92 (d, *J* = 8.9 Hz, 1H), 7.60 (d, *J* = 2.0 Hz, 1H), 7.41 (dd, *J* = 8.9, 2.0 Hz, 1H), 4.09 (s, 3H). **<sup>13</sup>C-NMR** (126 MHz, CDCl<sub>3</sub>) δ [ppm] = 150.35, 134.45, 130.05, 128.69, 121.98, 117.65, 117.13, 112.61, 104.36, 54.45.

### 2,3,5-Tribromoindole (**3**)

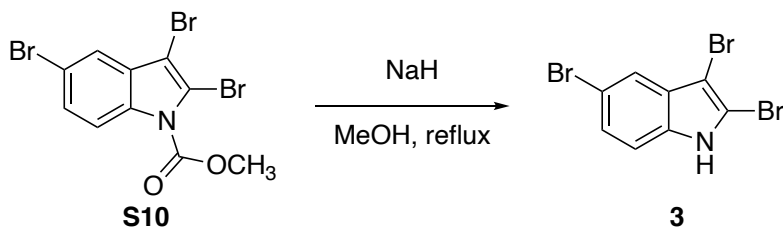

Compound **S10** (50 mg, 0.12 mmol) was suspended in MeOH (3 mL). 60% NaH in mineral oil (8 mg, 0.18 mmol) was added, and the reaction mixture was refluxed for 2 h. The reaction was quenched with saturated NH<sub>4</sub>Cl, diluted with EtOAc, washed with brine, and dried over MgSO<sub>4</sub>. After removing the solvent by evaporation at reduced pressure, the resulting crude product was purified by flash column chromatography on SiO<sub>2</sub> (EtOAc /hexane) to afford **3** in 50% yield.

**<sup>1</sup>H-NMR** (500 MHz, CDCl<sub>3</sub>) δ [ppm] = 8.40 (s, 1H), 7.64 (d, *J* = 1.7 Hz, 1H), 7.31 (dd, *J* = 8.6, 1.9 Hz, 1H), 7.17 (d, *J* = 8.7 Hz, 1H). **<sup>13</sup>C-NMR** (126 MHz, CDCl<sub>3</sub>) δ [ppm] = 134.30, 129.14, 126.50, 121.55, 114.67, 112.30, 111.38, 93.79, 77.40, 77.15, 76.90

### 4.3 Synthesis of 3,5-dibromoindole (**8**)

This synthesis was carried out following the protocol reported by Parrick *et al.*<sup>9</sup>

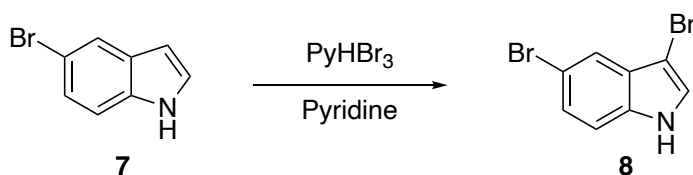

A cold solution of pyridinium hydrobromide perbromide (360 mg, 1.12 mmol) in pyridine (2 mL) was added dropwise to a stirred solution of 5-bromoindole (**7**) (200 mg, 1.02 mmol) in pyridine (2 mL) kept on ice. After 0.5 h, the mixture was poured into cold diethyl ether. The precipitated material was filtered off, and the filtrate was washed with dilute hydrochloric acid, dilute aqueous sodium hydroxide and water, dried over MgSO<sub>4</sub>, and evaporated to yield 3,5-dibromoindole (**8**) in 80% yield.

**<sup>1</sup>H-NMR** (500 MHz, CDCl<sub>3</sub>) δ [ppm] = 8.24 (s, 1H), 7.73 (d, *J* = 1.9 Hz), 7.33 (dd, *J* = 8.6, 1.9 Hz, 1H), 7.24 (d, *J* = 8.7 Hz, 1H), 7.23 (d, *J* = 2.6 Hz, 1H). **<sup>13</sup>C-NMR** (126 MHz, CDCl<sub>3</sub>) δ [ppm] = 134.07, 128.68, 126.29, 124.64, 122.01, 114.09, 113.01, 91.09.

#### 4.4 Synthesis of 5,7-dibromoindole-3-carbonitrile (**2**)

This synthesis was adapted from the experimental protocol reported by Degnan *et al.*<sup>10</sup>

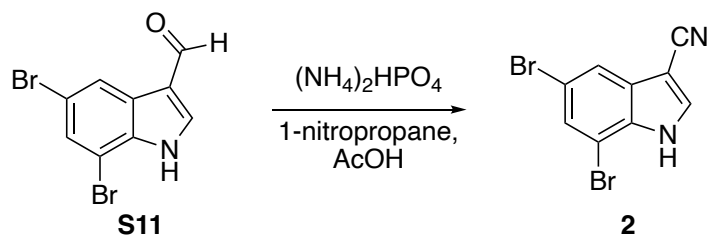

A mixture containing compound **S11** (100 mg, 0.33 mmol), ammonium phosphate, dibasic (217 mg, 1.65 mmol), and 1-nitropropane (0.056 mL, 0.66 mmol) in acetic acid (3 mL) was heated overnight under reflux condition. The solvent was evaporated, and the residue was taken up in aqueous sodium bicarbonate and extracted with EtOAc. The organic layer was dried over  $\text{MgSO}_4$  and concentrated under reduced pressure. The crude product was purified by flash column chromatography on  $\text{SiO}_2$  (EtOAc /hexane) to give **2** in 30% yield.

**$^1\text{H-NMR}$**  (500 MHz,  $d_6$ -DMSO)  $\delta$  [ppm] = 8.40 (s, 1H), 7.84 (d,  $J = 1.7$  Hz, 1H), 7.71 (d,  $J = 1.7$  Hz, 1H).  **$^{13}\text{C-NMR}$**  (126 MHz,  $d_6$ -DMSO)  $\delta$  [ppm] = 137.08, 133.02, 129.30, 128.00, 120.46, 115.12, 114.36, 106.51, 85.65. **HRMS** (ESI):  $m/z$ : *calcd for*  $\text{C}_9\text{H}_4\text{Br}_2\text{N}_2$   $[\text{M}+\text{H}]^+$ : 297.8741; found: 296.8660

## 5. NMR spectra

### $^1\text{H}$ NMR (500 MHz, $\text{d}_6\text{-DMSO}$ )

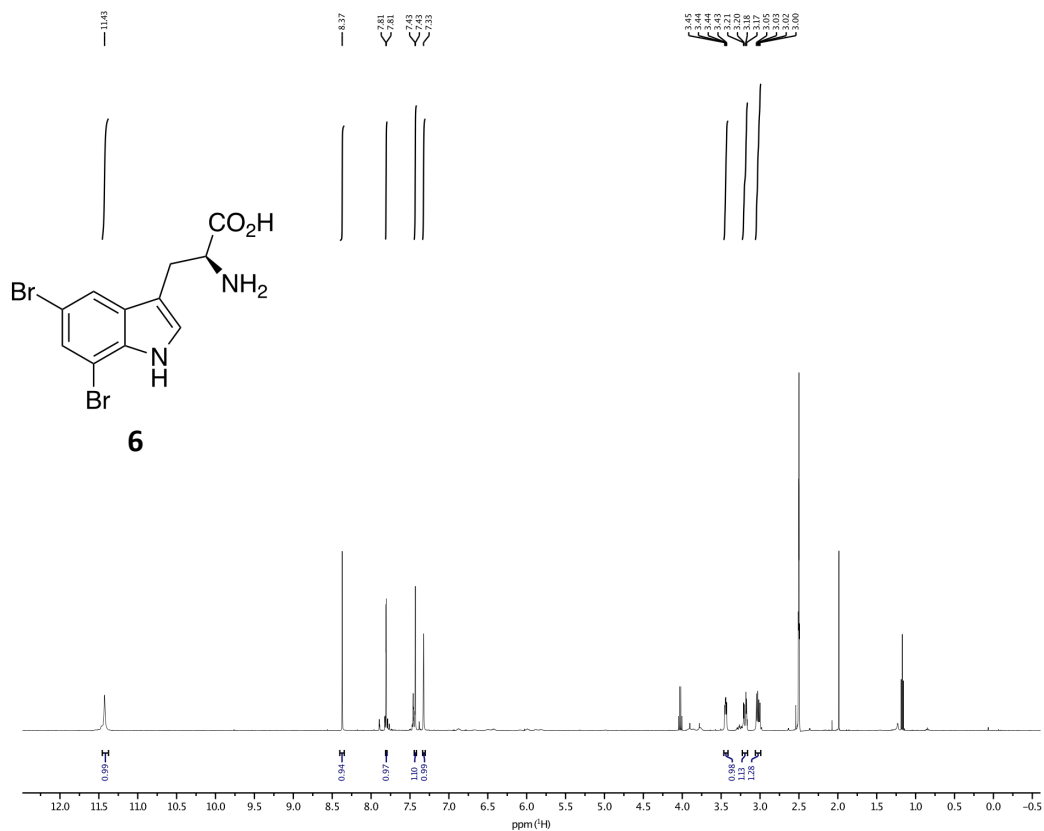

### $^{13}\text{C}$ NMR (126 MHz, $\text{d}_6\text{-DMSO}$ )

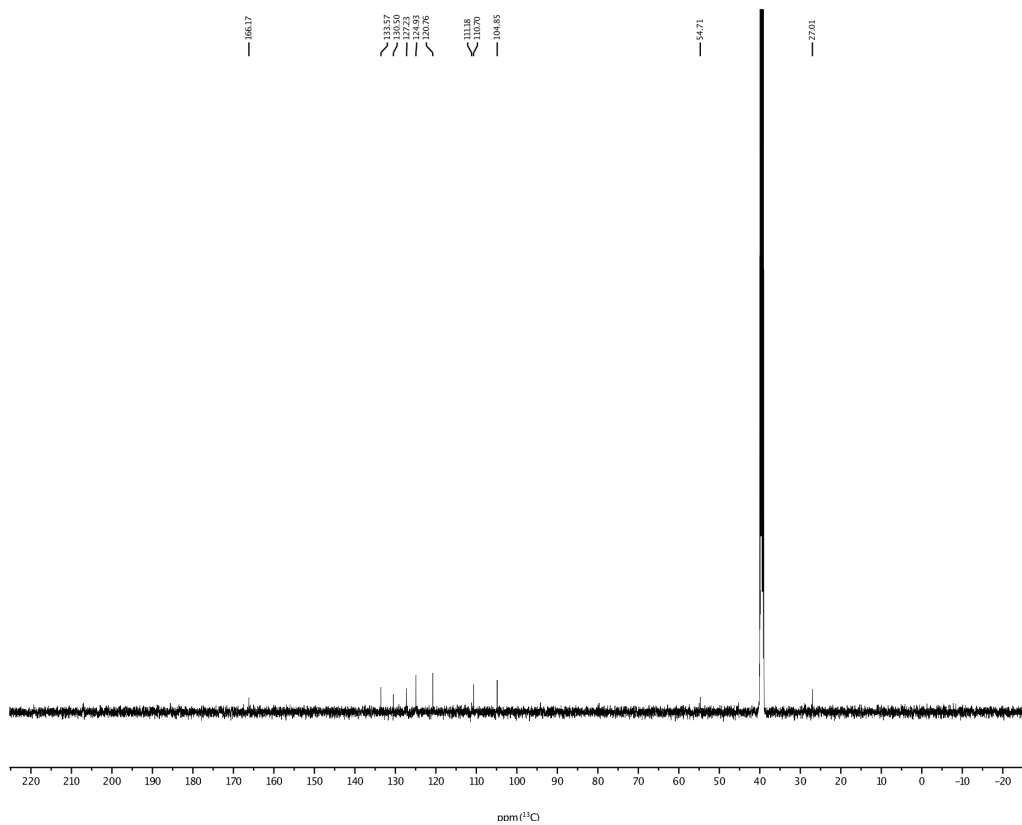

# <sup>1</sup>H NMR (500 MHz, CDCl<sub>3</sub>)

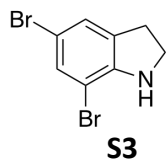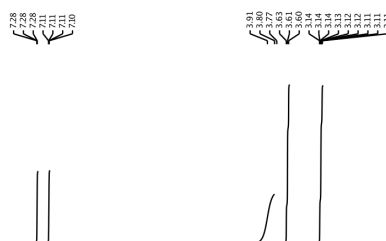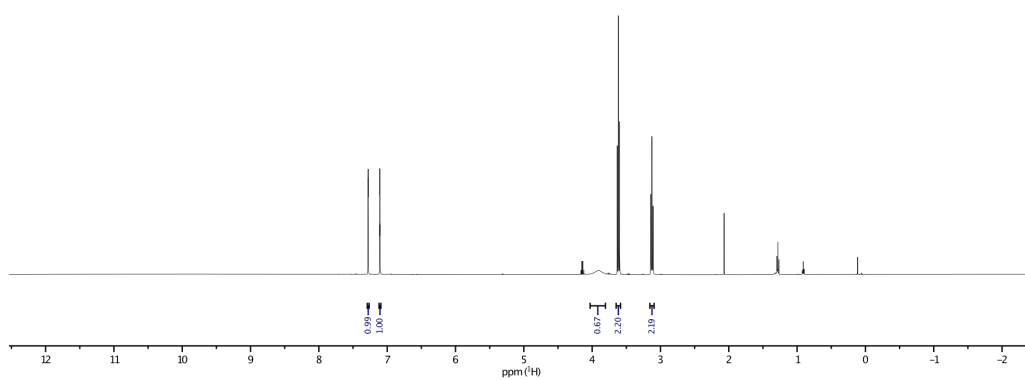

# <sup>13</sup>C NMR (126 MHz, CDCl<sub>3</sub>)

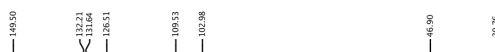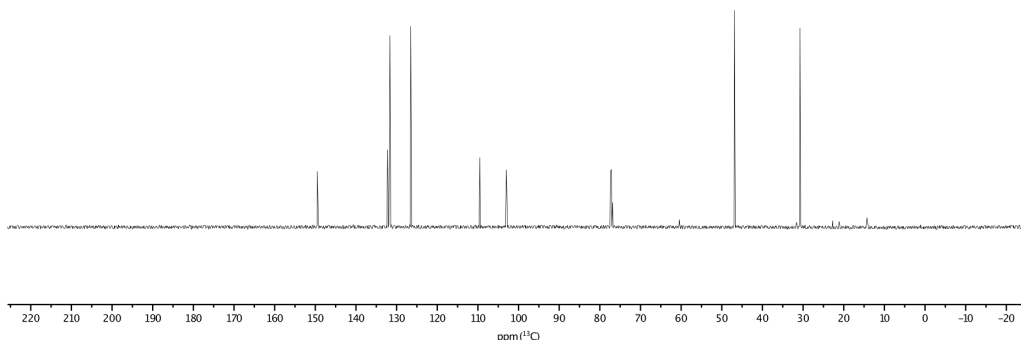

**<sup>1</sup>H NMR (500 MHz, CDCl<sub>3</sub>)**

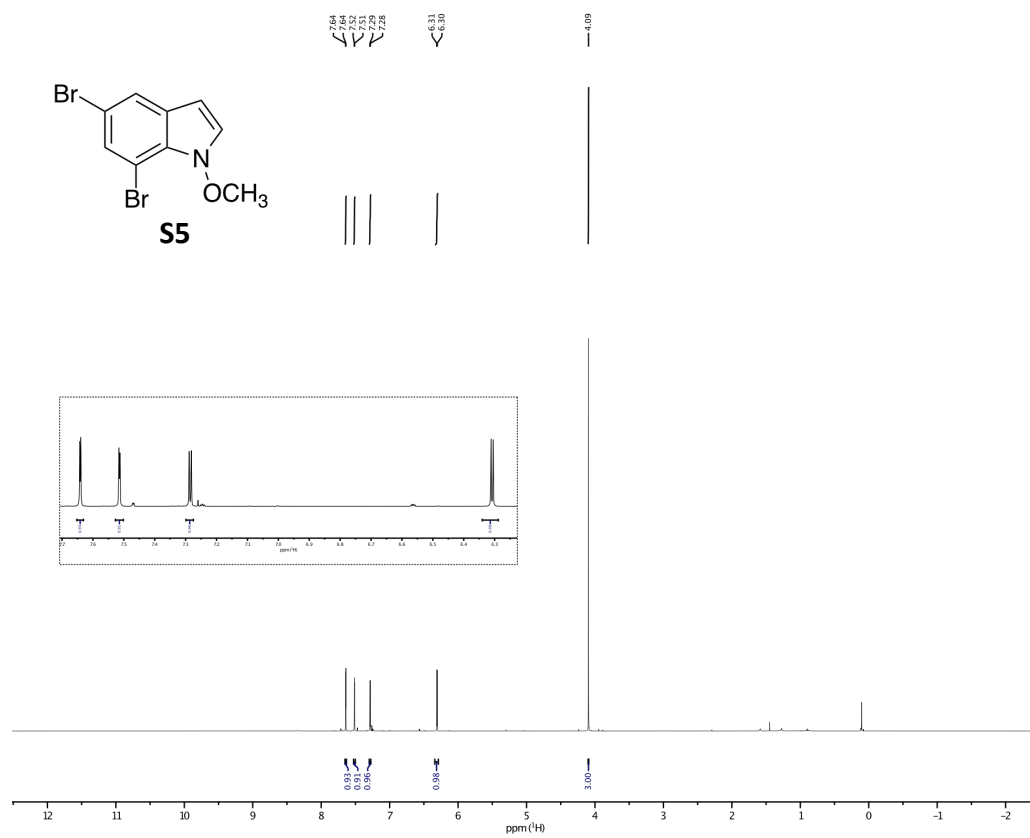

**<sup>13</sup>C NMR (126 MHz, CDCl<sub>3</sub>)**

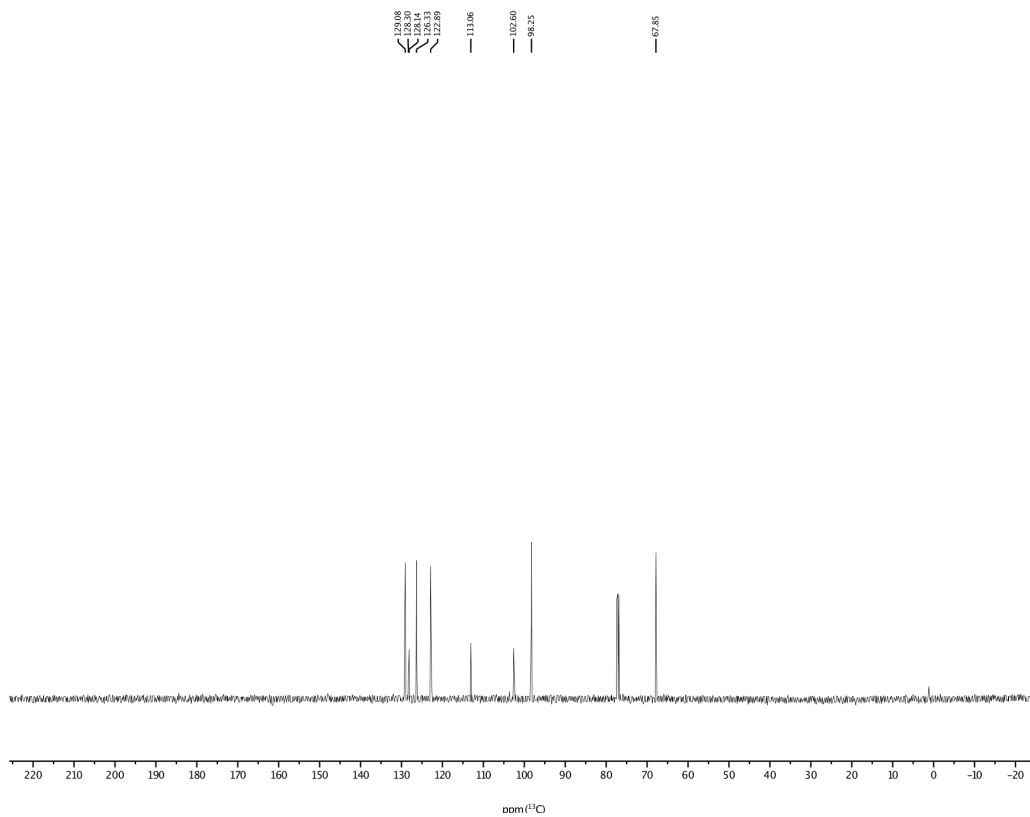

# <sup>1</sup>H NMR (500 MHz, CDCl<sub>3</sub>)

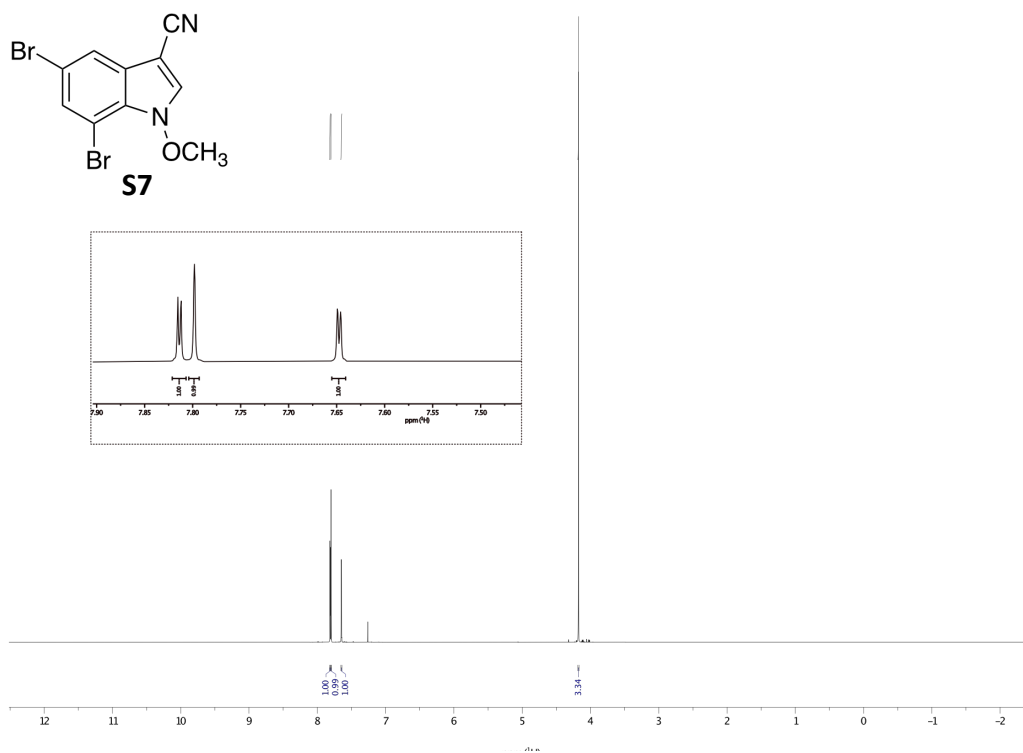

# <sup>13</sup>C NMR (126 MHz, CDCl<sub>3</sub>)

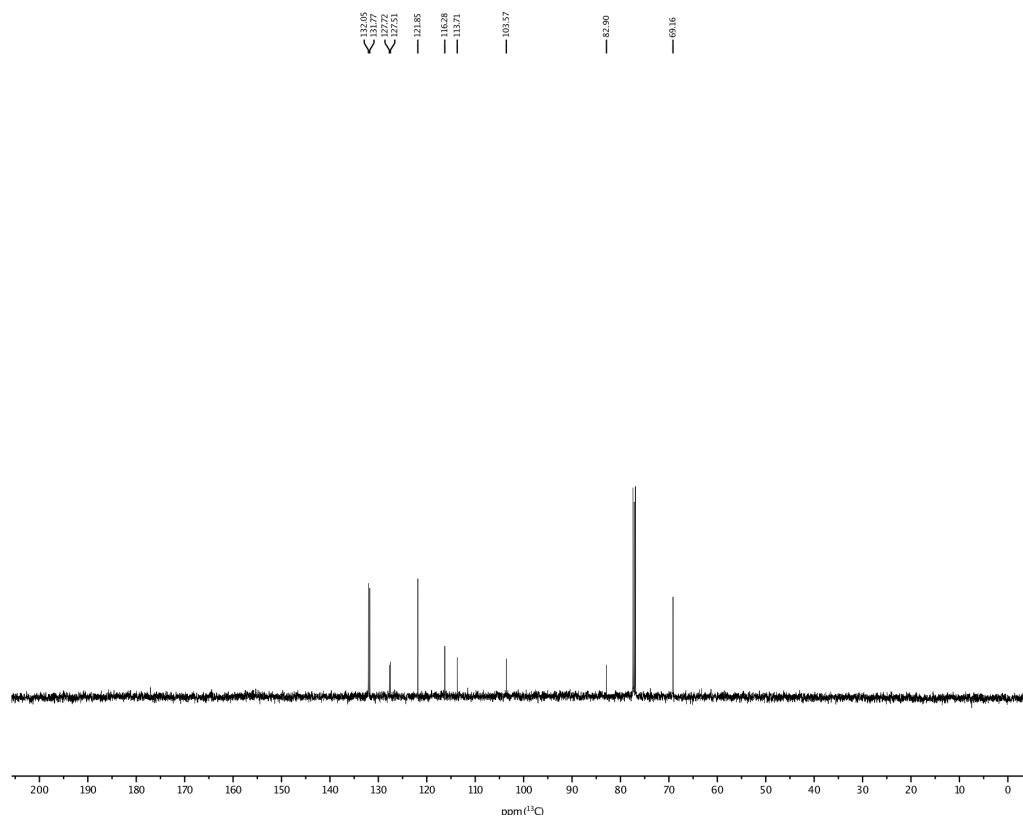





# <sup>1</sup>H NMR (500 MHz, CDCl<sub>3</sub>)

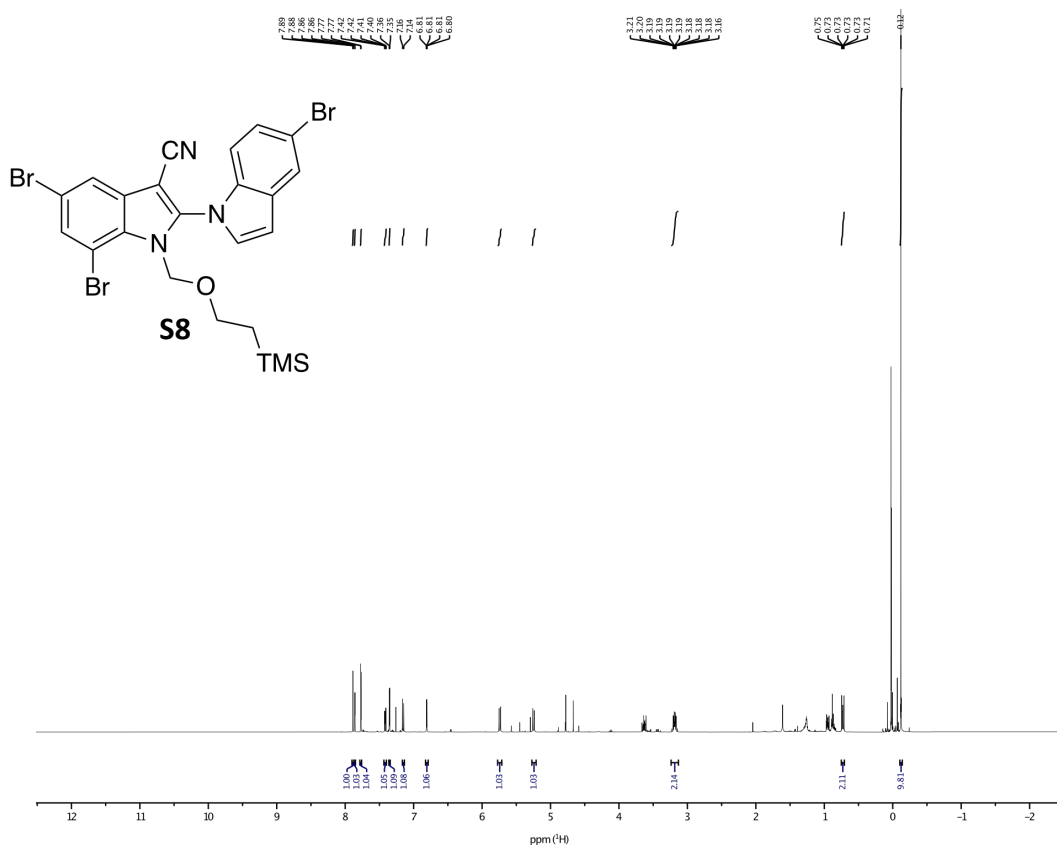

# <sup>13</sup>C NMR (126 MHz, CDCl<sub>3</sub>)

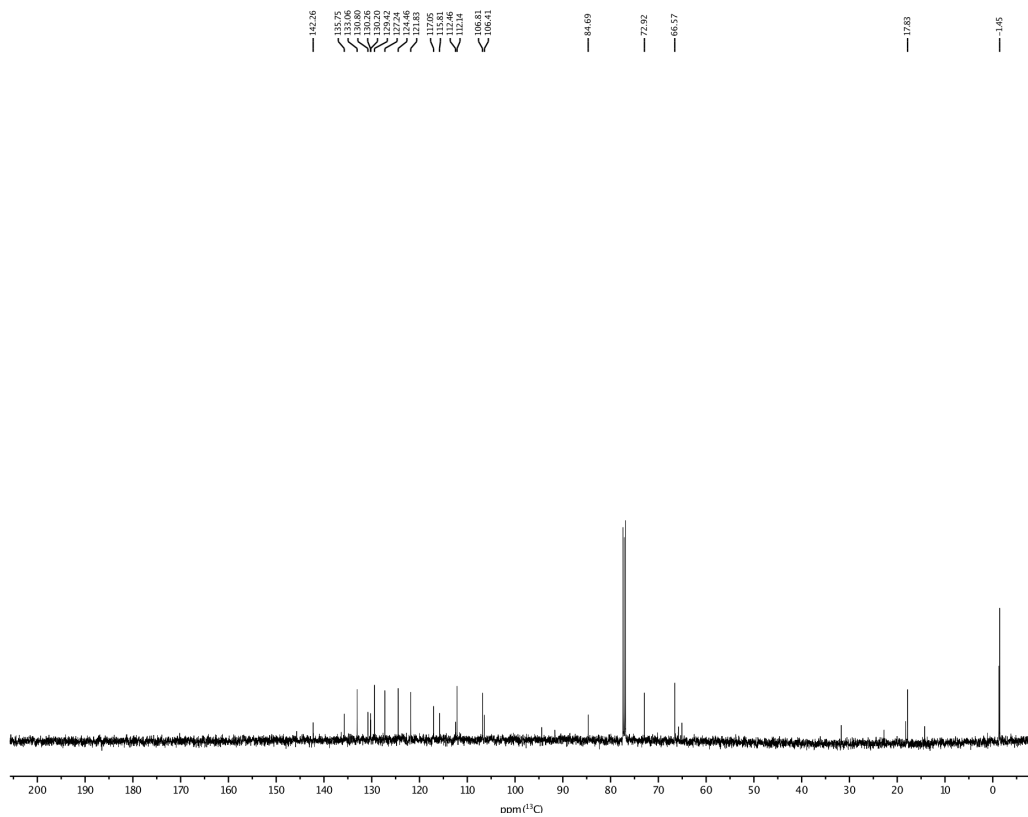

### <sup>1</sup>H NMR (500 MHz, d<sub>8</sub>-THF)

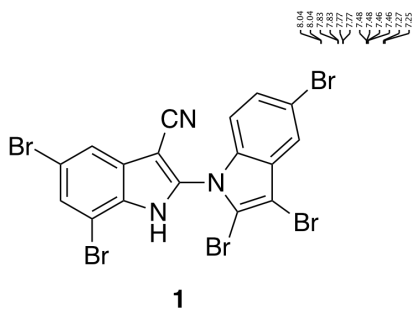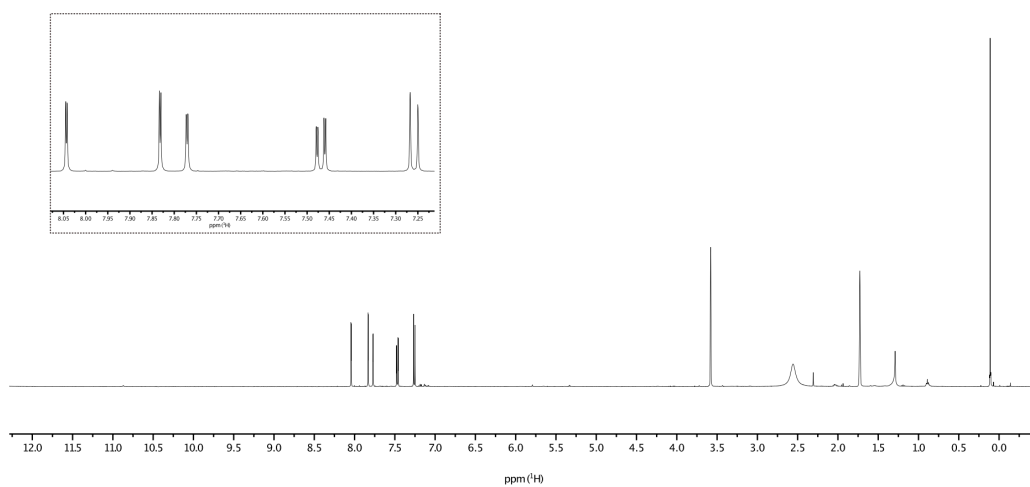

### <sup>13</sup>C NMR (126 MHz, d<sub>8</sub>-THF)

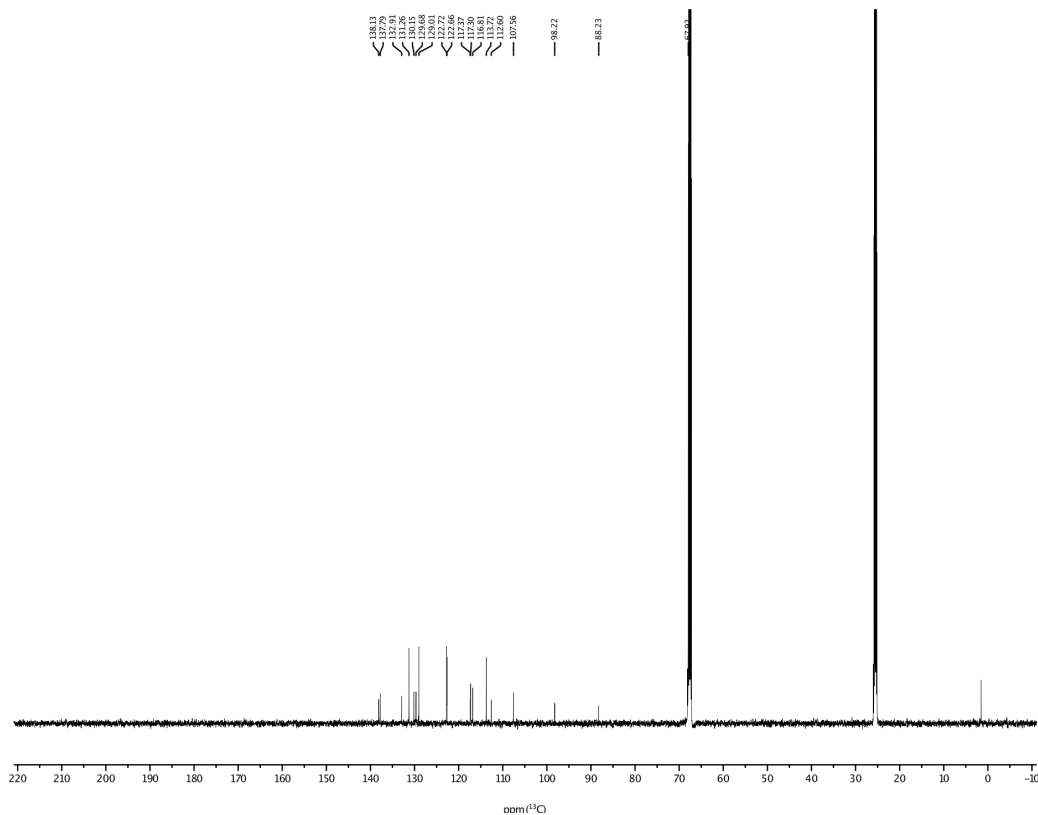

**<sup>1</sup>H NMR (500 MHz, CDCl<sub>3</sub>)**

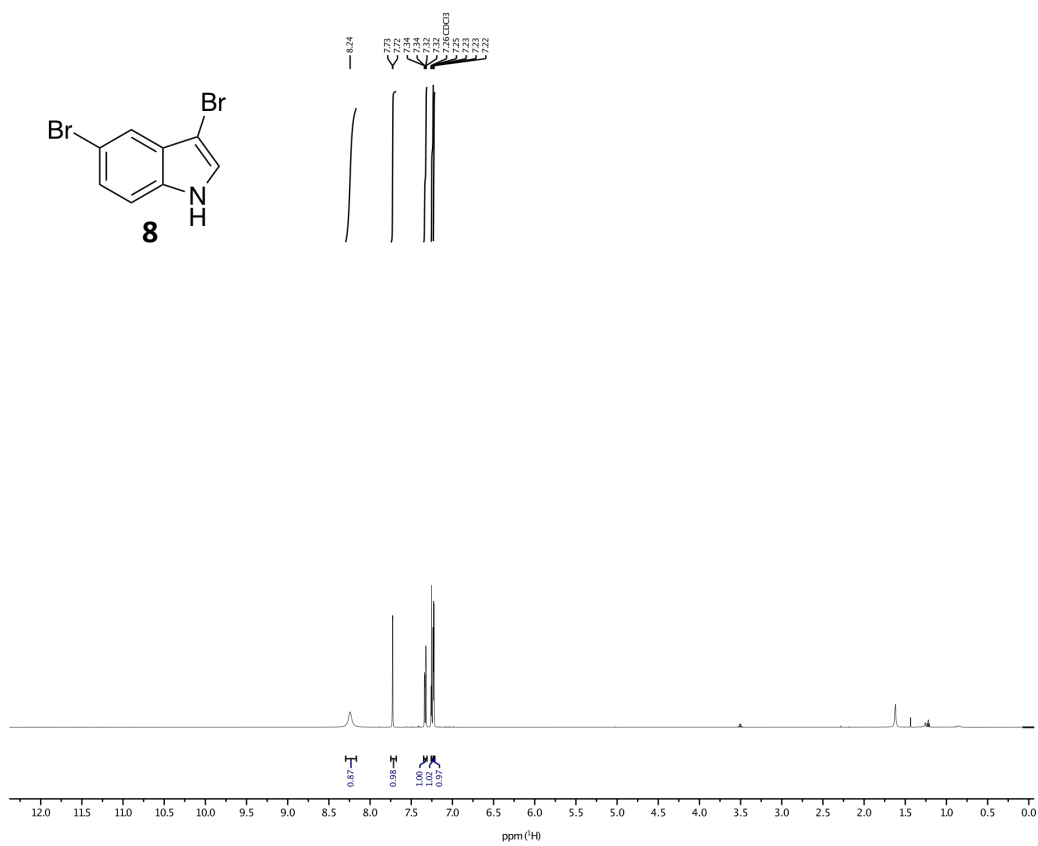

**<sup>13</sup>C NMR (126 MHz, CDCl<sub>3</sub>)**

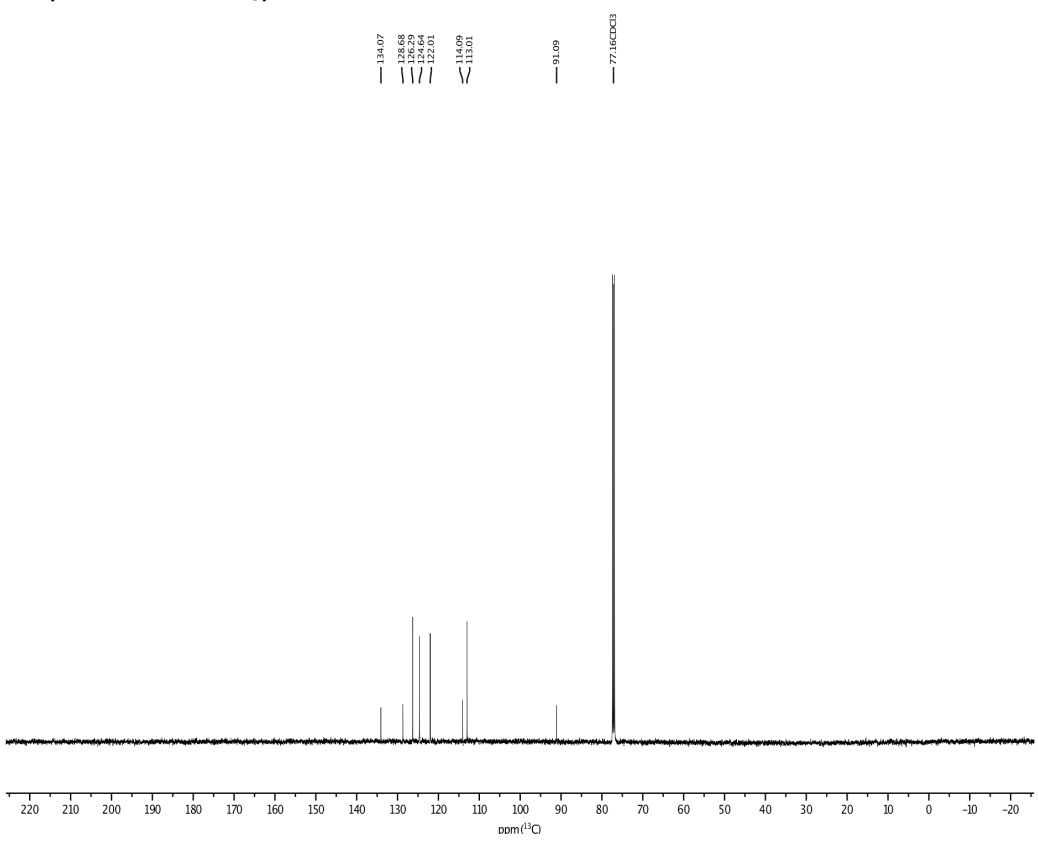

# <sup>1</sup>H NMR (500 MHz, d<sub>6</sub>-DMSO)

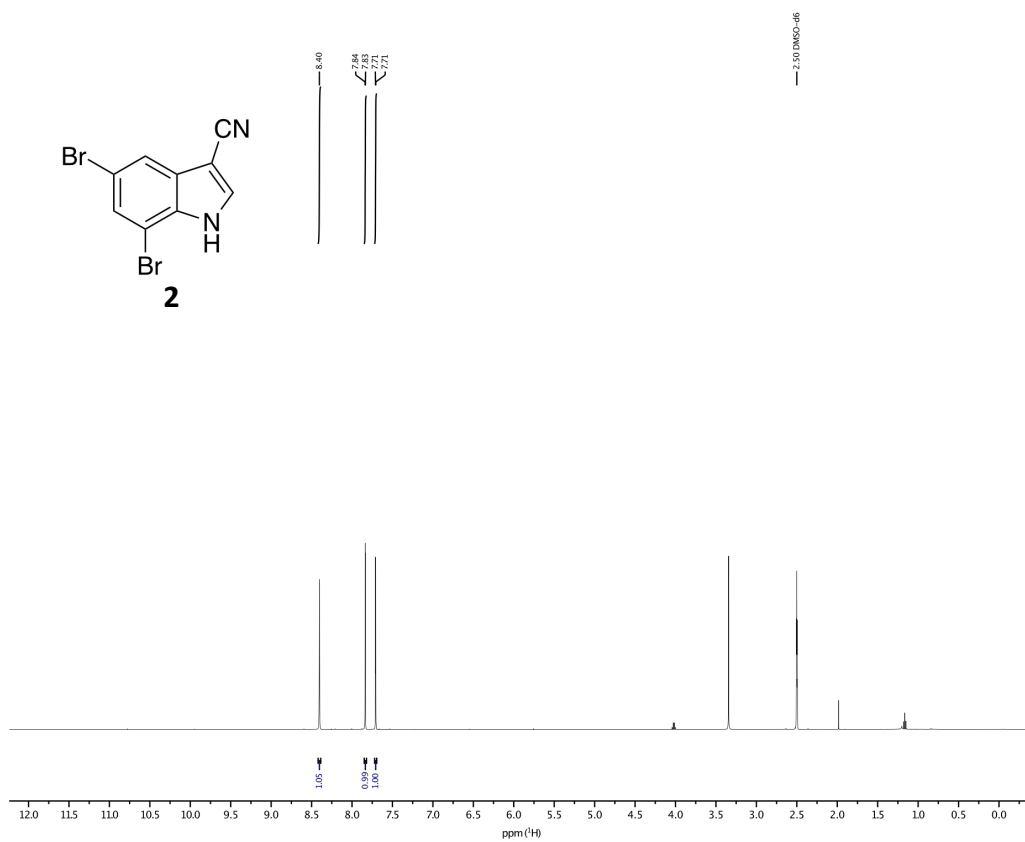

# <sup>13</sup>C NMR (126 MHz, d<sub>6</sub>-DMSO)

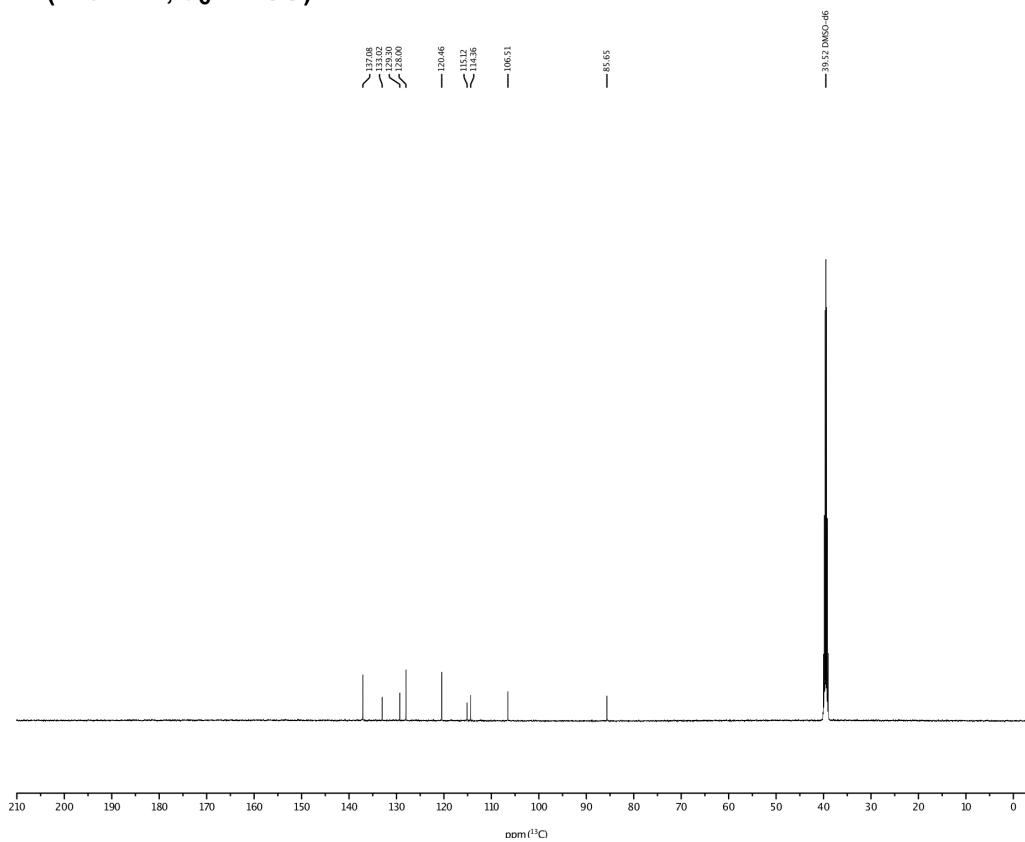

### <sup>1</sup>H NMR (500 MHz, CDCl<sub>3</sub>)

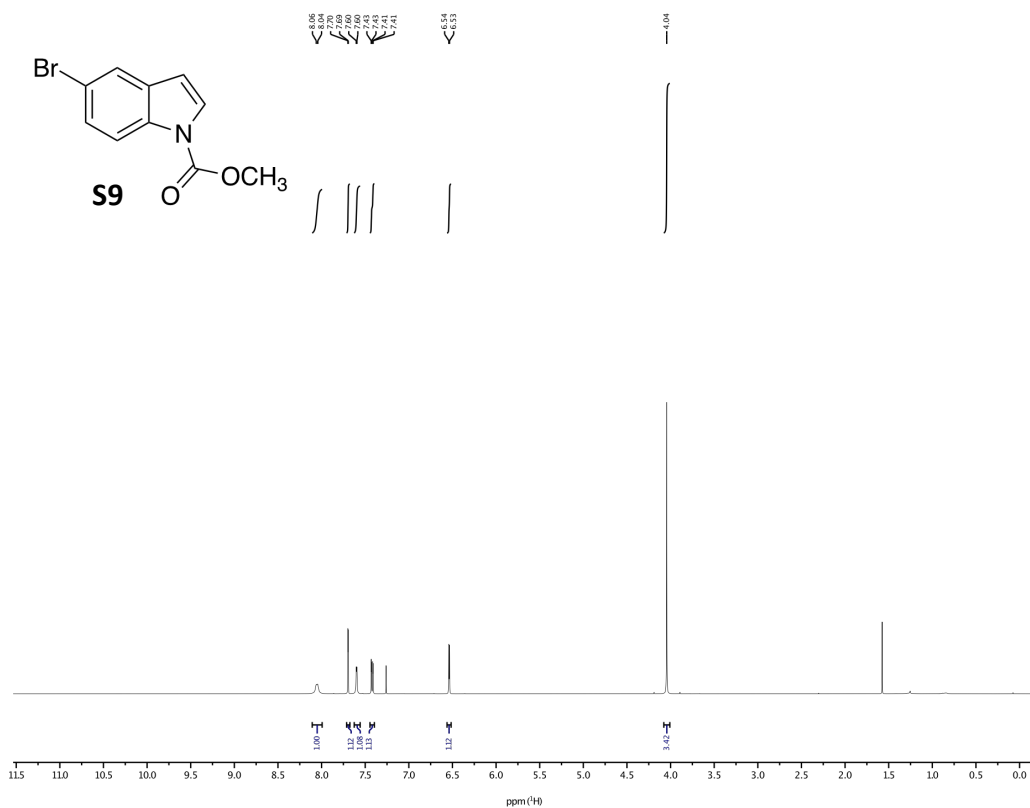

### <sup>13</sup>C NMR (126 MHz, CDCl<sub>3</sub>)

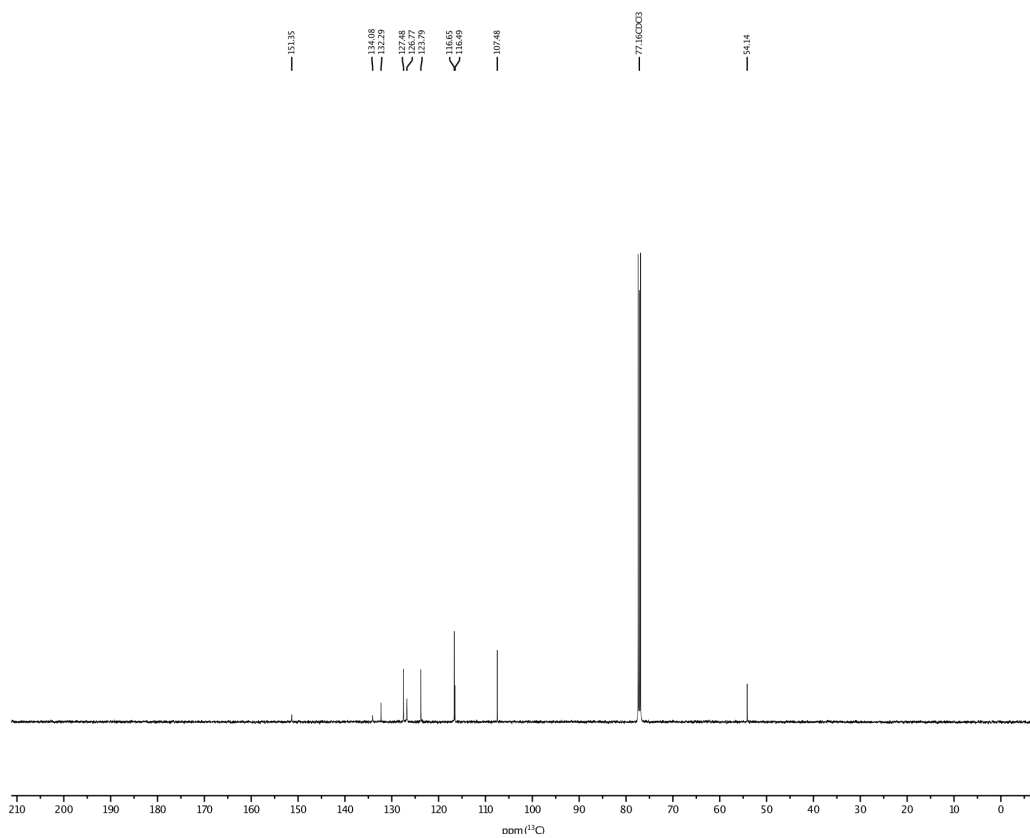

# <sup>1</sup>H NMR (500 MHz, CDCl<sub>3</sub>)

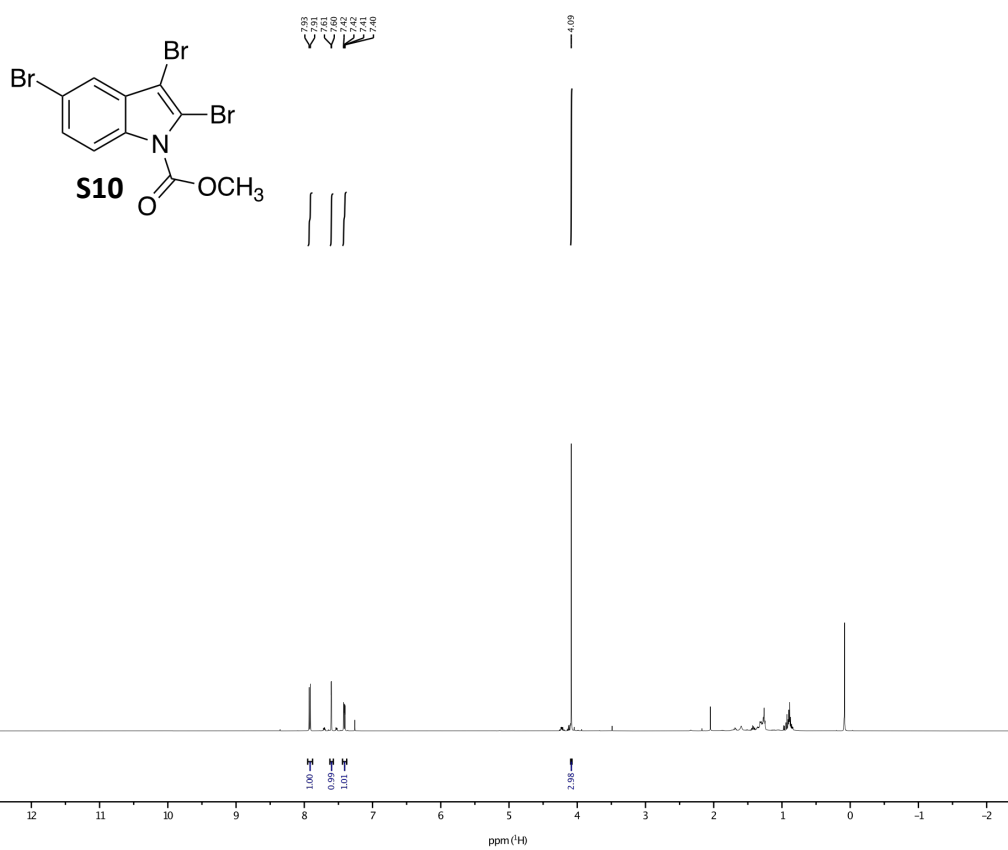

# <sup>13</sup>C NMR (126 MHz, CDCl<sub>3</sub>)

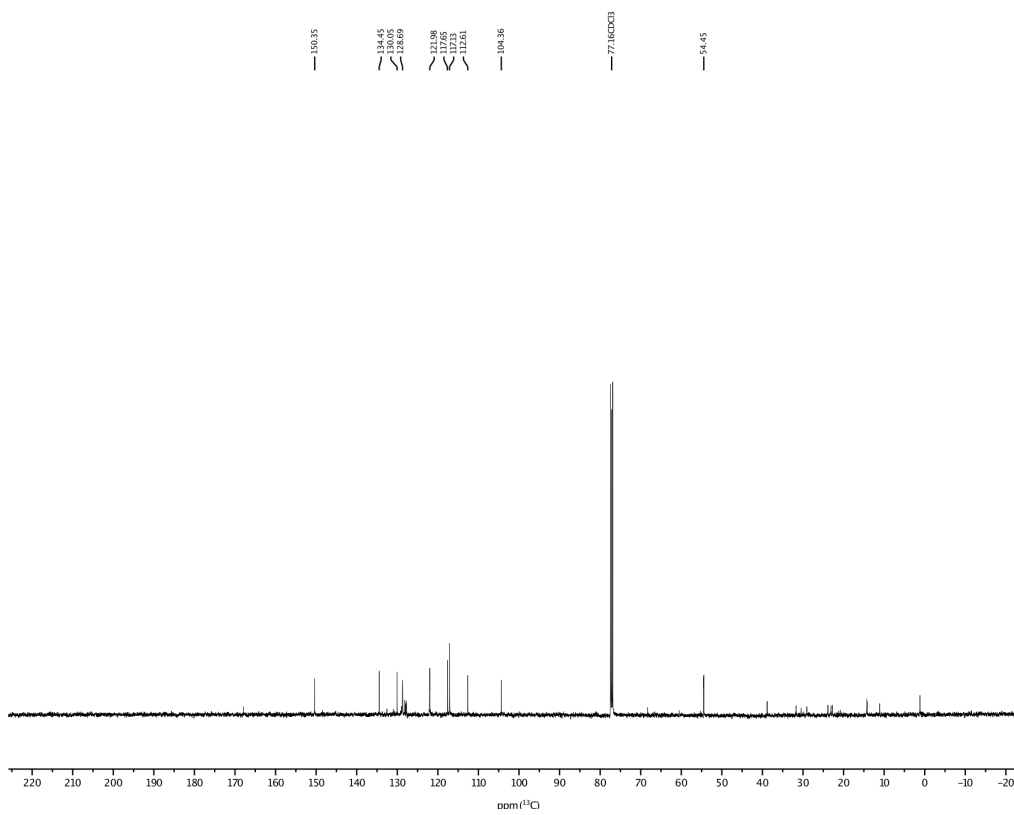

### <sup>1</sup>H NMR (500 MHz, CDCl<sub>3</sub>)

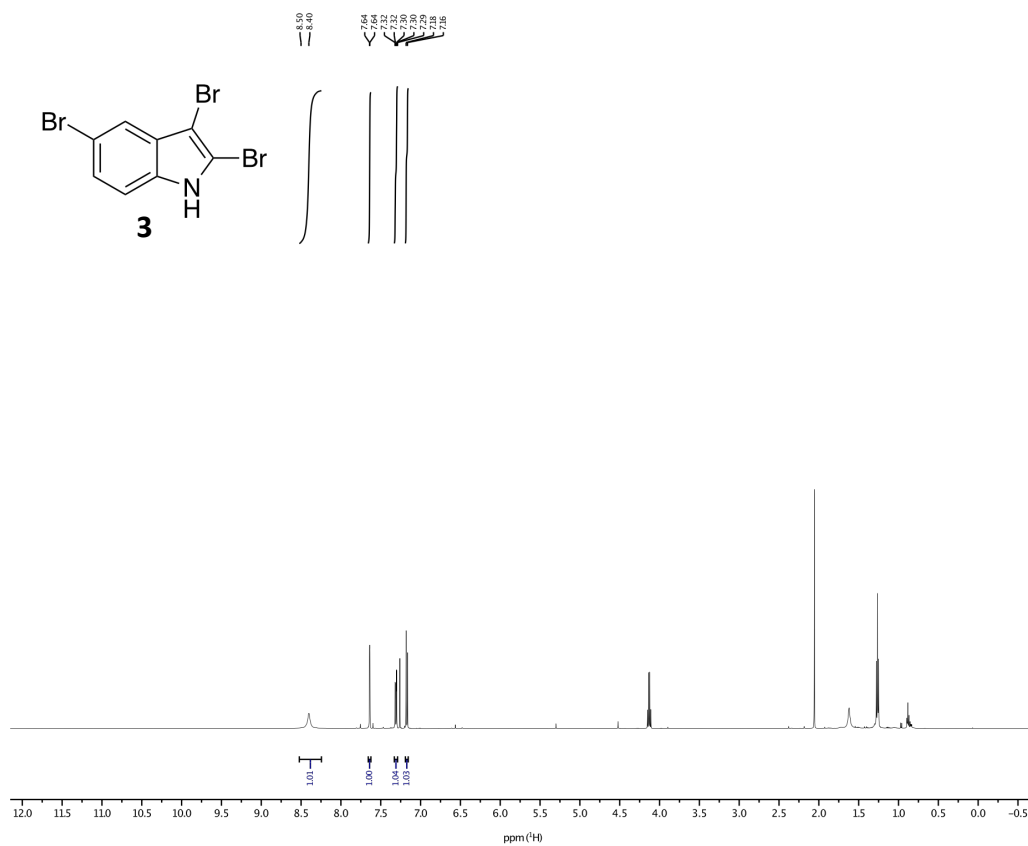

### <sup>13</sup>C NMR (126 MHz, CDCl<sub>3</sub>)

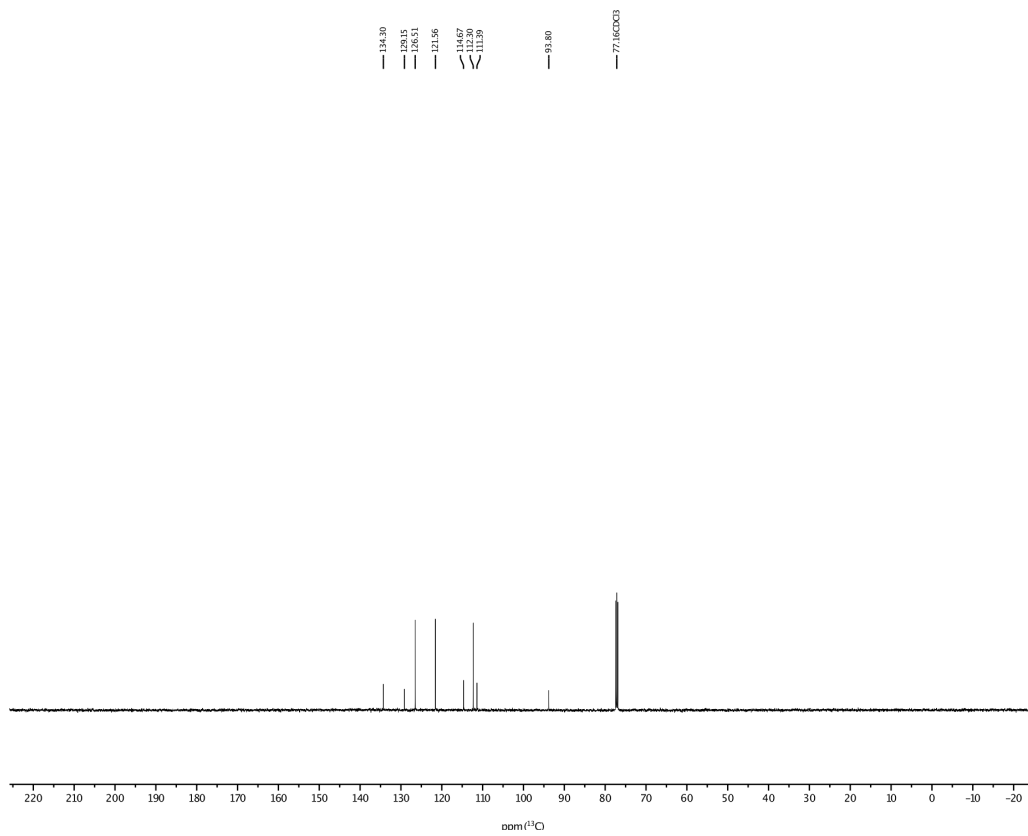



## References

- (1) Eichhorn, E.; Van der Ploeg, J. R.; Leisinger, T. *J. Biol. Chem.* **1999**, *274*, 26639-26646
- (2) Breinlinger, S.; Philipps, T. J.; Haram, B. N.; Mares, J.; Martinez Yerena, J. A.; Hrouzek, P.; Sobotka, R.; Henderson, W. M.; Schmieder, P.; Williams, S. M.; Lauderdale, J. D.; Wilde, H. D.; Gerrin, W.; Kust, A.; Washington, J. W.; Wagner, C.; Geier, B.; Liebeke, M.; Enke, H.; Niedermeyer, T. H. J., Wilde, S. B. *Science* **2021**, *371*, eaax9050
- (3) Huijbers, M. M. E.; Montersino, S.; Westphal, A. H.; Tischler, D.; Van Berkel, W. J. H. *Arch. Biochem. Biophys.* **2014**, *544*, 2-17;
- (4) Gerlt, J. A.; Bouvier, J. T.; Davidson, D. B.; Imker, H. J.; Sadkhin, B.; Slater, D. R.; Whalen, K. L. *Biochim. Biophys. Acta.* **2015**, *1854*, 1019-1037.
- (5) Fisher, B. F.; Snodgrass, H. M.; Jones, K. A.; Andorfer, M. C.; Lewis, J. C. *ACS Cent. Sci.* **2019**, *5*, 1844-1856.
- (6) Ricardo, M. G.; Schwark, M.; Llanes, D.; Niedermeyer, T. H. J.; Westermann, B. *Chem. Eur. J.* **2021**, *27*, 12032-12035.
- (7) Tomakinian, T.; Kouklovsky, C.; Vincent, G. *Synlett* **2015**, *26*, 1269.
- (8) Ueno, A.; Kayaki, Y.; Ikariya, T. *Organometallics* **2014**, *33*, 4479–4485
- (9) Parrick, J.; Yahya, A.; Ijaz, A. S., Yizun, J. *J. Chem. Soc., Perkin Trans 1*, **1989**, 2009-2015.
- (10) Degnan, A. P.; Tora, G. O.; Denhart, D. J.; Vrudhula, V. M.; Macor, J. E., Bronson, J. J. PCT Int. Appl. 2009009411, 15 Jan 2009.
